# Supplementary material for: Organic corrosion inhibitors for aluminium and its alloys in acid solutions: a review
Source: Royal Society of Chemistry journal article supplement (doi:10.1039/c6ra11818f), 2016-01-01
Supplement: c6ra11818f1.pdf [file c6ra11818f1.pdf]

### SUPPLEMENTARY INFORMATION

**Table S1:** The inhibition effectiveness of different organic corrosion inhibitors for aluminium and different aluminium alloys in various solutions. The inhibition effectiveness values are reported as given in the article or calculated from the corrosion rate, corrosion current/current density, or resistance given in the article. In instances where different techniques were used for the determination of the inhibition effectiveness, the range from the minimum to the maximum values reported in the article is reported below in this table.

| Material | Inhibitor                                                                                  | Inhibitor concentration | Medium  | $\eta$ (%) | Test methods and conditions | Ref.          |
|----------|--------------------------------------------------------------------------------------------|-------------------------|---------|------------|-----------------------------|---------------|
| 100%     | 1,4,8,11,15,18,22,25-octabutoxy-29 <i>H</i> ,31 <i>H</i> -phthalocyanine                   | 25–100 ppm              | 1 M HCl | 76.5–83.9  | PDP at 25 °C                | <sup>45</sup> |
| 100%     | 2,3,9,10,16,17,23,24-octakis(octyloxy)-29 <i>H</i> ,31 <i>H</i> -phthalocyanine            | 25–100 ppm              | 1 M HCl | 70.3–85.0  | PDP at 25 °C                | <sup>45</sup> |
| 100%     | 2,9,16,23-tetra- <i>tert</i> -butyl-29 <i>H</i> ,31 <i>H</i> -phthalocyanine               | 25–100 ppm              | 1 M HCl | 74.8–83.8  | PDP at 25 °C                | <sup>45</sup> |
| 100%     | 29 <i>H</i> ,31 <i>H</i> -phthalocyanine (Pc4)                                             | 25–100 ppm              | 1 M HCl | 74.2–83.0  | PDP at 25 °C                | <sup>45</sup> |
| 100%     | 5,9,14,18,23,27,32,36-octabutoxy-2,3-naphthalocyanine                                      | 25–100 ppm              | 1 M HCl | 70.0–86.1  | PDP at 25 °C                | <sup>45</sup> |
| 100%     | 2,11,20,29-tetra- <i>tert</i> -butyl-2,3-naphthalocyanine                                  | 25–100 ppm              | 1 M HCl | 84.3–91.2  | PDP at 25 °C                | <sup>45</sup> |
| 100%     | 2,3-naphthalocyanine                                                                       | 25–100 ppm              | 1 M HCl | 65.3–96.2  | PDP at 25 °C                | <sup>45</sup> |
| 100%     | 1,4,8,11,15,18,22,25-octabutoxy-29 <i>H</i> ,31 <i>H</i> -phthalocyanine + 0.5 M KI        | 25–100 ppm              | 1 M HCl | 84.5–90.3  | PDP at 25 °C                | <sup>45</sup> |
| 100%     | 2,3,9,10,16,17,23,24-octakis(octyloxy)-29 <i>H</i> ,31 <i>H</i> -phthalocyanine + 0.5 M KI | 25–100 ppm              | 1 M HCl | 77.2–87.4  | PDP at 25 °C                | <sup>45</sup> |
| 100%     | 2,9,16,23-tetratert-butyl-29 <i>H</i> ,31 <i>H</i> -phthalocyanine + 0.5 M KI              | 25–100 ppm              | 1 M HCl | 76.5–86.9  | PDP at 25 °C                | <sup>45</sup> |
| 100%     | 29 <i>H</i> ,31 <i>H</i> -phthalocyanine + 0.5 M KI                                        | 25–100 ppm              | 1 M HCl | 77.8–91.5  | PDP at 25 °C                | <sup>45</sup> |
| 100%     | 5,9,14,18,23,27,32,36-octabutoxy-2,3-naphthalocyanine + 0.5 M KI                           | 25–100 ppm              | 1 M HCl | 81.9–87.7  | PDP at 25 °C                | <sup>45</sup> |
| 100%     | 2,11,20,29-tetra- <i>tert</i> -butyl-2,3-naphthalocyanine + 0.5 M KI                       | 25–100 ppm              | 1 M HCl | 71.0–99.1  | PDP at 25 °C                | <sup>45</sup> |
| 100%     | 2,3-naphthalocyanine + 0.5 M KI                                                            | 25–100 ppm              | 1 M HCl | 56.5–99.6  | PDP at 25 °C                | <sup>45</sup> |
| 100%     | 1,4,8,11,15,18,22,25-octabutoxy-29 <i>H</i> ,31 <i>H</i> -phthalocyanine                   | 100 ppm                 | 1 M HCl | 67.6       | WL at 30 °C                 | <sup>45</sup> |
| 100%     | 2,3,9,10,16,17,23,24-octakis(octyloxy)-29 <i>H</i> ,31 <i>H</i> -phthalocyanine            | 100 ppm                 | 1 M HCl | 52.3       | WL at 30 °C                 | <sup>45</sup> |

|         |                                                                          |                                         |           |             |                                          |    |
|---------|--------------------------------------------------------------------------|-----------------------------------------|-----------|-------------|------------------------------------------|----|
| 100%    | 2,9,16,23-tetratert-butyl-29H,31H-phthalocyanine                         | 100 ppm                                 | 1 M HCl   | 54.3        | WL at 30 °C                              | 45 |
| 100%    | 29H,31H-phthalocyanine                                                   | 100 ppm                                 | 1 M HCl   | 46.2        | WL at 30 °C                              | 45 |
| 100%    | 5,9,14,18,23,27,32,36-octabutoxy-2,3-naphthalocyanine                    | 100 ppm                                 | 1 M HCl   | 56.8        | WL at 30 °C                              | 45 |
| 100%    | 2,11,20,29-tetra-tert-butyl-2,3-naphthalocyanine                         | 100 ppm                                 | 1 M HCl   | 51.7        | WL at 30 °C                              | 45 |
| 100%    | 2,3-naphthalocyanine                                                     | 100 ppm                                 | 1 M HCl   | 61.3        | WL at 30 °C                              | 45 |
| 100%    | 1,4,8,11,15,18,22,25-octabutoxy-29H,31H-phthalocyanine + 0.5 M KI        | 100 ppm                                 | 1 M HCl   | 93.3        | WL at 30 °C                              | 45 |
| 100%    | 2,3,9,10,16,17,23,24-octakis(octyloxy)-29H,31H-phthalocyanine + 0.5 M KI | 100 ppm                                 | 1 M HCl   | 76.5        | WL at 30 °C                              | 45 |
| 100%    | 2,9,16,23-tetratert-butyl-29H,31H-phthalocyanine + 0.5 M KI              | 100 ppm                                 | 1 M HCl   | 77.9        | WL at 30 °C                              | 45 |
| 100%    | 29H,31H-phthalocyanine + 0.5 M KI                                        | 100 ppm                                 | 1 M HCl   | 79.5        | WL at 30 °C                              | 45 |
| 100%    | 5,9,14,18,23,27,32,36-octabutoxy-2,3-naphthalocyanine + 0.5 M KI         | 100 ppm                                 | 1 M HCl   | 87.3        | WL at 30 °C                              | 45 |
| 100%    | 2,11,20,29-tetra-tert-butyl-2,3-naphthalocyanine + 0.5 M KI              | 100 ppm                                 | 1 M HCl   | 78.6        | WL at 30 °C                              | 45 |
| 100%    | 2,3-naphthalocyanine + 0.5 M KI                                          | 100 ppm                                 | 1 M HCl   | 82.5        | WL at 30 °C                              | 45 |
| 99.999% | Phenol                                                                   | 0.01 M                                  | 0.5 M HCl | 13.0–71.0   | PDP at 25–45 °C                          | 46 |
| 99.999% | Benzene-1,2,4,5-tetracarboxylic dianhydride                              | 0.0004–0.010 M                          | 1 M HCl   | 6.40–52.48  | EIS and polarisation at 25 °C            | 47 |
| 99.999% | Benzene-1,2,4,5-tetracarboxylic dianhydride                              | 0.0004–0.010 M                          | 1 M HCl   | 3.00–39.10  | Polarization at 35 °C                    | 47 |
| 99.999% | Benzene-1,2,4,5-tetracarboxylic dianhydride                              | 0.0004–0.010 M                          | 1 M HCl   | 2.30–27.70  | Polarization at 45 °C                    | 47 |
| 99.999% | Benzene-1,2,4,5-tetracarboxylic dianhydride                              | 0.0004–0.010 M                          | 1 M HCl   | 2.00–25.00  | Polarization at 55 °C                    | 47 |
| 99.999% | 2-amino-4,5-imidazoledicarbonitril                                       | $1 \cdot 10^{-4}$ – $5 \cdot 10^{-3}$ M | 1 M HCl   | 65.81–96.30 | WL, Tafel extrapolation and EIS at 25 °C | 48 |
| 99.999% | 5-amino-4-imidazolecarboxamide                                           | $1 \cdot 10^{-4}$ – $5 \cdot 10^{-3}$ M | 1 M HCl   | 50.95–92.29 | WL, Tafel extrapolation and EIS at 25 °C | 48 |
| 99.999% | Imidazole                                                                | $1 \cdot 10^{-4}$ – $5 \cdot 10^{-3}$ M | 1 M HCl   | 29.72–85.19 | WL, Tafel extrapolation and EIS at 25 °C | 48 |
| 99.998% | 1,(4)-tetrakis[(2-mercapto)pyridine]phthalocyanine                       | $5 \cdot 10^{-6}$ – $5 \cdot 10^{-4}$ M | 0.1 M HCl | 51.0–83.0   | PDP and at 25 °C                         | 49 |

|         |                                                                                                                                                |                                         |           |             |                                 |    |
|---------|------------------------------------------------------------------------------------------------------------------------------------------------|-----------------------------------------|-----------|-------------|---------------------------------|----|
| 99.998% | 2,3-oktakis[(2-mercapto)pridine]phthalocyanine                                                                                                 | $5 \cdot 10^{-6}$ – $5 \cdot 10^{-4}$ M | 0.1 M HCl | 52.0–67.0   | PDP and at 25 °C                | 49 |
| 99.998% | 1,(4)-tetrakis[(2-mercapto)pridine]phthalocyanine                                                                                              | $5 \cdot 10^{-4}$ M                     | 0.1 M HCl | 49.0–85.0   | PDP at 15–35 °C                 | 49 |
| 99.998% | N-4-bromobenzilidene-2-aminophenol                                                                                                             | 10 ppm                                  | 0.1 M HCl | 45.0        | EIS, PDP, $R_p$ and HE at 25 °C | 50 |
| 99.998% | N-4-ethoxybenzilidene-2-aminophenol                                                                                                            | 10 ppm                                  | 0.1 M HCl | 20.0        | EIS, PDP, $R_p$ and HE at 25 °C | 50 |
| 99.998% | Ni(II)complex of N-4-ethoxybenzilidene-2-aminophenol                                                                                           | 10 ppm                                  | 0.1 M HCl | 70.0        | EIS, PDP, $R_p$ and HE at 25 °C | 50 |
| 99.998% | Cu(II) complex of N-4-ethoxybenzilidene-2-aminophenol                                                                                          | 10 ppm                                  | 0.1 M HCl | 68.0        | EIS, PDP, $R_p$ and HE at 25 °C | 50 |
| 99.998% | Cu(II) complex of N-4-bromobenzilidene-2-aminophenol                                                                                           | 10 ppm                                  | 0.1 M HCl | 62.0        | EIS, PDP, $R_p$ and HE at 25 °C | 50 |
| 99.998% | Ni(II) complex of N-4-bromobenzilidene-2-aminophenol                                                                                           | 10 ppm                                  | 0.1 M HCl | 52.0        | EIS, PDP, $R_p$ and HE at 25 °C | 50 |
| 99.998% | Co(II) complex of N-4-ethoxybenzilidene-2-aminophenol                                                                                          | 10 ppm                                  | 0.1 M HCl | 40.0        | EIS, PDP, $R_p$ and HE at 25 °C | 50 |
| 99.998% | Co(II) complex of N-4-bromobenzilidene-2-aminophenol                                                                                           | 10 ppm                                  | 0.1 M HCl | 38.0        | EIS, PDP, $R_p$ and HE at 25 °C | 50 |
| 99.99%  | Glutamic acid                                                                                                                                  | $1 \cdot 10^{-7}$ – $1 \cdot 10^{-3}$ M | 0.1 M HCl | 44.8–85.0   | $R_p$ and EIS at 25 °C          | 51 |
| 99.99%  | Imidazole                                                                                                                                      | $3$ – $18 \cdot 10^{-5}$ M              | 0.5 M HCl | 20.1–70.7   | PDP at 30 °C                    | 52 |
| 99.99%  | 2-methyl imidazole                                                                                                                             | $3$ – $18 \cdot 10^{-5}$ M              | 0.5 M HCl | 21.4–76.0   | PDP at 30 °C                    | 52 |
| 99.99%  | Imidazole                                                                                                                                      | $9$ – $18 \cdot 10^{-5}$ M              | 0.5 M HCl | 42.3–68.8   | EIS at 30 °C<br>EFM at 30 °C    | 52 |
| 99.99%  | 2-methyl imidazole                                                                                                                             | $9$ – $18 \cdot 10^{-5}$ M              | 0.5 M HCl | 46.3–71.8   | EIS at 30 °C<br>EFM at 30 °C    | 52 |
| 99.99%  | Sodium salt of 2-((4-(3-methoxypropoxy)-3-methylpyridin-2-yl)methylsulfinyl)-1H-benzimidazole (Omeprazole)                                     | 100–500 ppm                             | 1.0 M HCl | 55.94–91.66 | WL, HE, GSP and EIS at 30 °C    | 53 |
| 99.99%  | Sodium salt of 1-(2-((3,4-dimethoxypyridin-2-yl)methylsulfinyl)-1H-benzimidazol-6-yl)-2,2-difluoroethanone (Pantoprazole sodium sesquihydrate) | 100–500 ppm                             | 1.0 M HCl | 76.85–92.59 | WL, HE, GSP and EIS at 30 °C    | 53 |
| 99.99%  | 5-methoxy-2-((4-methoxy-3,5-dimethylpyridin-2-yl)methylsulfinyl)-1H-benzimidazole (Rabeprazole)                                                | 100–500 ppm                             | 1.0 M HCl | 57.28–      | WL, HE, GSP and EIS at 30       | 53 |

|        |                                                                                                                                                |              |           |             |                                 |    |
|--------|------------------------------------------------------------------------------------------------------------------------------------------------|--------------|-----------|-------------|---------------------------------|----|
|        | sodium)                                                                                                                                        |              |           | 94.09       | °C                              |    |
| 99.99% | Sodium salt of 2-((4-(3-methoxypropoxy)-3-methylpyridin-2-yl)methylsulfinyl)-1H-benzimidazole (Omeprazole)                                     | 500 ppm      | 1.0 M HCl | 72.55–91.66 | WL at 30–60 °C                  | 53 |
| 99.99% | Sodium salt of 1-(2-((3,4-dimethoxypyridin-2-yl)methylsulfinyl)-1H-benzimidazol-6-yl)-2,2-difluoroethanone (Pantoprazole sodium sesquihydrate) | 500 ppm      | 1.0 M HCl | 75.81–92.59 | WL at 30–60 °C                  | 53 |
| 99.99% | 5-methoxy-2-((4-methoxy-3,5-dimethylpyridin-2-yl)methylsulfinyl)-1H-benzimidazole (Rabeprazole Sodium)                                         | 500 ppm      | 1.0 M HCl | 77.04–93.88 | WL at 30–60 °C                  | 53 |
| 99.99% | 4-hydroxy-3-methoxy benzaldehyde (Vanillin) in 20/80 ethyl alcohol-water mixture                                                               | 200–4000 ppm | 5 M HCl   | 93.49–99.80 | WL, HE, PSP at 30 °C            | 55 |
| 99.95% | Sulfonic acid                                                                                                                                  | 50–550 ppm   | 0.2 M HCl | 37.6–85.6   | WL at 40 °C                     | 56 |
| 99.95% | Sodium cumene sulfonate                                                                                                                        | 50–550 ppm   | 0.2 M HCl | 13.6–44.0   | WL at 40 °C                     | 56 |
| 99.95% | Sodium alkyl sulfate                                                                                                                           | 50–550 ppm   | 0.2 M HCl | 6.4–28.8    | WL at 40 °C                     | 56 |
| 99.95% | Sulfonic acid                                                                                                                                  | 25–200 ppm   | 0.5 M HCl | 22.0–70.0   | WL at 30 °C                     | 56 |
| 99.95% | Sodium cumene sulfonate                                                                                                                        | 25–200 ppm   | 0.5 M HCl | 10.0–49.0   | WL at 30 °C                     | 56 |
| 99.95% | Sodium alkyl sulfate                                                                                                                           | 25–200 ppm   | 0.5 M HCl | 6.0–31.0    | WL at 30 °C                     | 56 |
| 99.95% | Sulfonic acid                                                                                                                                  | 350 ppm      | 0.2 M HCl | 81.5        | PSP                             | 56 |
| 99.95% | Sodium cumene sulfonate                                                                                                                        | 350 ppm      | 0.2 M HCl | 43.6        | PSP                             | 56 |
| 99.95% | Sodium alkyl sulfate                                                                                                                           | 350 ppm      | 0.2 M HCl | 26.5        | PSP                             | 56 |
| 99.95% | Cetyl trimethylammonium chloride                                                                                                               | 50–550 ppm   | 0.2 M HCl | 30.8–55.0   | WL after 1 h immersion at 40 °C | 57 |
| 99.95% | Cetyl trimethylammonium chloride                                                                                                               | 150–350 ppm  | 0.5 M HCl | 47.3–55.1*  | PSP                             | 57 |
| 99.95% | Carboxy methyl chitosan                                                                                                                        | 200–1000 ppm | 0.5 M HCl | 35.5–70.9   | WL and GSP at 30 °C             | 58 |
| 99.95% | Carboxy methyl cellulose                                                                                                                       | 200–1000 ppm | 0.5 M HCl | 40.2–81.3   | WL and GSP at 30 °C             | 58 |
| 99.95% | Carboxy methyl chitosan                                                                                                                        | 200–1000 ppm | 0.5 M HCl | 40.6–69.8   | WL at 30–60 °C                  | 58 |
| 99.95% | Carboxy methyl cellulose                                                                                                                       | 200–1000 ppm | 0.5 M HCl | 49.8–81.3   | WL at 30–60 °C                  | 58 |
| 99.95% | Polyethylene glycol (MW = 600 g/mol)                                                                                                           | 200–1000 ppm | 0.5 M HCl | 25.7–70.9   | WL and GSP at 30 °C             | 59 |
| 99.95% | Polyethylene glycol (MW = 2000 g/mol)                                                                                                          | 200–1000 ppm | 0.5 M HCl | 28.9–74.9   | WL and GSP at 30 °C             | 59 |

|        |                                               |                                 |           |             |                          |               |
|--------|-----------------------------------------------|---------------------------------|-----------|-------------|--------------------------|---------------|
| 99.95% | Polyethylene glycol ( <i>MW</i> = 6000 g/mol) | 200–1000 ppm                    | 0.5 M HCl | 36.9–77.0   | WL and GSP at 30 °C      | <sup>59</sup> |
| 99.95% | Polyethylene glycol ( <i>MW</i> = 600 g/mol)  | 200–1000 ppm                    | 0.5 M HCl | 42.6–62.2   | WL at 30–60 °C           | <sup>59</sup> |
| 99.95% | Polyethylene glycol ( <i>MW</i> = 2000 g/mol) | 200–1000 ppm                    | 0.5 M HCl | 46.4–68.2   | WL at 30–60 °C           | <sup>59</sup> |
| 99.95% | Polyethylene glycol ( <i>MW</i> = 6000 g/mol) | 200–1000 ppm                    | 0.5 M HCl | 49.8–70.4   | WL at 30–60 °C           | <sup>59</sup> |
| 99.95% | 1-butyl-3-methylimidazolium chloride          | $5 \cdot 10^{-4}$ – $10^{-2}$ M | 1 M HCl   | 27.7–82.6   | WL, PDP and EIS at 30 °C | <sup>60</sup> |
| 99.95% | 1-hexyl-3-methylimidazolium chloride          | $5 \cdot 10^{-4}$ – $10^{-2}$ M | 1 M HCl   | 34.7–91.4   | WL, PDP and EIS at 30 °C | <sup>60</sup> |
| 99.95% | 1-octyl-3-methylimidazolium chloride          | $5 \cdot 10^{-4}$ – $10^{-2}$ M | 1 M HCl   | 50.2–94.0   | WL, PDP and EIS at 30 °C | <sup>60</sup> |
| 99.95% | 1-butyl-3-methylimidazolium chloride          | $5 \cdot 10^{-4}$ – $10^{-2}$ M | 1 M HCl   | 23.6–76.0   | WL at 40 °C              | <sup>60</sup> |
| 99.95% | 1-hexyl-3-methylimidazolium chloride          | $5 \cdot 10^{-4}$ – $10^{-2}$ M | 1 M HCl   | 29.8–85.3   | WL at 40 °C              | <sup>60</sup> |
| 99.95% | 1-octyl-3-methylimidazolium chloride          | $5 \cdot 10^{-4}$ – $10^{-2}$ M | 1 M HCl   | 43.1–87.9   | WL at 40 °C              | <sup>60</sup> |
| 99.95% | 1-butyl-3-methylimidazolium chloride          | $5 \cdot 10^{-4}$ – $10^{-2}$ M | 1 M HCl   | 18.5–70.1   | WL at 50 °C              | <sup>60</sup> |
| 99.95% | 1-hexyl-3-methylimidazolium chloride          | $5 \cdot 10^{-4}$ – $10^{-2}$ M | 1 M HCl   | 17.4–68.7   | WL at 50 °C              | <sup>60</sup> |
| 99.95% | 1-octyl-3-methylimidazolium chloride          | $5 \cdot 10^{-4}$ – $10^{-2}$ M | 1 M HCl   | 36.3–82.3   | WL at 50 °C              | <sup>60</sup> |
| 99.95% | 1-butyl-3-methylimidazolium chloride          | $5 \cdot 10^{-4}$ – $10^{-2}$ M | 1 M HCl   | 12.9–64.2   | WL at 60 °C              | <sup>60</sup> |
| 99.95% | 1-hexyl-3-methylimidazolium chloride          | $5 \cdot 10^{-4}$ – $10^{-2}$ M | 1 M HCl   | 17.4–68.7   | WL at 60 °C              | <sup>60</sup> |
| 99.95% | 1-octyl-3-methylimidazolium chloride          | $5 \cdot 10^{-4}$ – $10^{-2}$ M | 1 M HCl   | 31.8–76.0   | WL at 60 °C              | <sup>60</sup> |
| 99.91% | Polyacrylamide                                | $10^{-5}$ – $10^{-4}$ M         | 0.5 M HCl | 51.30–90.00 | WL at 30 °C and HE       | <sup>61</sup> |
| 99.91% | Polyacrylamide                                | $10^{-5}$ – $10^{-4}$ M         | 0.5 M HCl | 32.55–56.60 | WL at 60 °C and HE       | <sup>61</sup> |
| 99.91% | Polyacrylamide + 5 mM KBr                     | $10^{-5}$ – $10^{-4}$ M         | 0.5 M HCl | 65.40–94.04 | WL at 30 °C and HE       | <sup>61</sup> |
| 99.91% | Polyacrylamide + 5 mM KBr                     | $10^{-5}$ – $10^{-4}$ M         | 0.5 M HCl | 40.75–      | WL at 60 °C              | <sup>61</sup> |

|         |                                                                        |                         |               |                 |                                                      |               |
|---------|------------------------------------------------------------------------|-------------------------|---------------|-----------------|------------------------------------------------------|---------------|
|         |                                                                        |                         |               | 64.52           | and<br>HE                                            |               |
| 99.91%  | Polyacrylamide + 5 mM KI                                               | $10^{-5}$ – $10^{-4}$ M | 0.5 M HCl     | 74.30–<br>97.32 | WL at 30 °C<br><br>and<br>HE                         | <sup>61</sup> |
| 99.91%  | Polyacrylamide + 5 mM KI                                               | $10^{-5}$ – $10^{-4}$ M | 0.5 M HCl     | 45.26–<br>69.70 | WL at 60 °C<br><br>and<br>HE                         | <sup>61</sup> |
| 99.9%   | Gelatin                                                                | 0.1–0.6%                | 0.1 N HCl     | 36.46–<br>64.13 | WL and Tafel<br>extrapolation                        | <sup>62</sup> |
| 99.9%   | Triton X-100                                                           | 0.1–0.6%                | 0.1 N HCl     | 47.63–<br>74.70 | Tafel<br>extrapolation                               | <sup>62</sup> |
| 99.9%   | Polyethylene glycol (MW = 300 g/mol)                                   | 0.3–15 mM               | 1.0 M HCl     | 25.0–<br>56.8   | WL and PDP<br>30 °C                                  | <sup>63</sup> |
| 99.9%   | Polyethylene glycol (MW = 400 g/mol)                                   | 0.3–15 mM               | 1.0 M HCl     | 27.7–<br>64.6   | WL and PDP<br>at 30 °C                               | <sup>63</sup> |
| 99.9%   | Polyethylene glycol (MW = 600 g/mol)                                   | 0.3–15 mM               | 1.0 M HCl     | 31.8–<br>66.9   | WL and PDP<br>at 30 °C                               | <sup>63</sup> |
| 99.9%   | Polyethylene glycol (MW = 300 g/mol)                                   | 15 mM                   | 1.0 M HCl     | 21.13–<br>55.60 | WL and PDP<br>at 30–45 °C                            | <sup>63</sup> |
| 99.9%   | Polyethylene glycol (MW = 400 g/mol)                                   | 15 mM                   | 1.0 M HCl     | 23.16–<br>64.00 | WL and PDP<br>at 30–45 °C                            | <sup>63</sup> |
| 99.9%   | Polyethylene glycol (MW = 600 g/mol)                                   | 15 mM                   | 1.0 M HCl     | 26.92–<br>66.10 | WL and PDP<br>at 30–45 °C                            | <sup>63</sup> |
| 99.899% | <i>bis</i> -(2-hydroxy-3-methoxy)-1,6-diaminohexane<br>salicylaldimine | 25–150 ppm              | 0.5–2.0 M HCl | 54.38–<br>85.62 | WL after 1 h<br>immersion at<br>25 °C                | <sup>64</sup> |
| 99.899% | <i>bis</i> -(2-hydroxy-3-methoxy)-1,6-diaminohexane<br>salicylaldimine | 25–150 ppm              | 1.0 M HCl     | 55.92–<br>85.40 | PDP and EIS<br>after 30 min<br>immersion at<br>25 °C | <sup>64</sup> |
| 99.899% | <i>bis</i> -(2-hydroxy-3-methoxy)-1,6-diaminohexane<br>salicylaldimine | 100 ppm                 | 0.5–2.0 M HCl | 84.43–<br>85.45 | PDP and EIS<br>after 30 min<br>immersion at<br>25 °C | <sup>64</sup> |
| 99.89%  | Polyoxyethylene 20 mono oleate                                         | 0.1–1 mM                | 1 M HCl       | 15.09–<br>43.21 | WL and PDP<br>at 25 °C                               | <sup>65</sup> |
| 99.89%  | Polyoxyethylene 40 mono oleate                                         | 0.1–1 mM                | 1 M HCl       | 39.63–<br>68.22 | WL and PDP<br>at 25 °C                               | <sup>65</sup> |

|        |                                                      |                                         |            |             |                                                         |               |
|--------|------------------------------------------------------|-----------------------------------------|------------|-------------|---------------------------------------------------------|---------------|
| 99.8%  | 4-phenyl-3-thiosemicarbazide                         | 60–150 ppm                              | 0.1 M HCl  | 25.4–73.0   | PDP and $R_p$ at 25 °C in aerated and stirred solutions | <sup>66</sup> |
| 99.8%  | 4-phenyl-3-thiosemicarbazide                         | 60–150 ppm                              | 0.1 M HCl  | 23.2–55.6   | PDP and $R_p$ at 40 °C in aerated and stirred solutions | <sup>66</sup> |
| 99.8%  | 4-phenyl-3-thiosemicarbazide                         | 60–150 ppm                              | 0.1 M HCl  | 17.5–49.5   | PDP and $R_p$ at 60 °C in aerated and stirred solutions | <sup>66</sup> |
| 99.8%  | 4-phenyl-3-thiosemicarbazide                         | 60–150 ppm                              | 0.1 M HCl  | 8.1–41.0    | PDP and $R_p$ at 70 °C in aerated and stirred solutions | <sup>66</sup> |
| 99.79% | 1,1 (lauryl amido) propyl ammonium chloride          | $2 \cdot 10^{-4}$ – $10^{-2}$ M         | 1 M HCl    | 22.40–97.70 | WL, PDP and EIS at 30 °C                                | <sup>67</sup> |
| 99.79% | 1,1 (lauryl amido) propyl ammonium chloride          | $2 \cdot 10^{-3}$ M                     | 1 M HCl    | 74.00–92.90 | WL, PDP and EIS at 10–60 °C                             | <sup>67</sup> |
| 99.6%  | 1-(2-fluorophenyl)2,5-dimethylpyrrole                | $1 \cdot 10^{-5}$ – $5 \cdot 10^{-3}$ M | 0.17 M HCl | 60.7–78.9   | PDP at 20 °C                                            | <sup>68</sup> |
| 99.6%  | 1-(2-fluorophenyl)2,5-dimethylpyrrole-3-carbaldehyde | $1 \cdot 10^{-5}$ – $5 \cdot 10^{-3}$ M | 0.17 M HCl | 76.1–97.9   | PDP at 20 °C                                            | <sup>68</sup> |
| 99.6%  | 1-(2-fluorophenyl)2,5-dimethylpyrrole                | $1 \cdot 10^{-3}$ M                     | 0.17 M HCl | 89.4        | EIS at 20 °C                                            | <sup>68</sup> |
| 99.6%  | 1-(2-fluorophenyl)2,5-dimethylpyrrole-3-carbaldehyde | $1 \cdot 10^{-3}$ M                     | 0.17 M HCl | 93.4        | EIS at 20 °C                                            | <sup>68</sup> |
| 99.6%  | 1-(2-methylphenyl)-2,5-dimethylpyrrole               | $5 \cdot 10^{-5}$ – $5 \cdot 10^{-3}$ M | 0.5 M HCl  | 70.4–81.8   | PDP on deaerated solutions                              | <sup>69</sup> |
| 99.6%  | 1-(2-fluorophenyl)-2,5-dimethylpyrrole               | $5 \cdot 10^{-3}$ M                     | 0.5 M HCl  | 93.2        | $R_p$ and EIS on deaerated solutions                    | <sup>69</sup> |
| 99.6%  | 1-(2-chlorophenyl)-2,5-dimethylpyrrole               | $5 \cdot 10^{-3}$ M                     | 0.5 M HCl  | 90.3        | $R_p$ and EIS on deaerated solutions                    | <sup>69</sup> |
| 99.6%  | 1-(2-iodophenyl)-2,5-dimethylpyrrole                 | $5 \cdot 10^{-3}$ M                     | 0.5 M HCl  | 91.0        | $R_p$ and EIS on deaerated solutions                    | <sup>69</sup> |
| 99.6%  | 1-(2-methylphenyl)-2,5-dimethylpyrrole               | $5 \cdot 10^{-3}$ M                     | 0.5 M HCl  | 93.2        | $R_p$ and EIS on deaerated solutions                    | <sup>69</sup> |
| 99.6%  | 1-(2-fluorophenyl)-2,5-dimethylpyrrole-3-            | $5 \cdot 10^{-3}$ M                     | 0.5 M HCl  | 98.2        | $R_p$ and EIS on deaerated                              | <sup>69</sup> |

|         |                                                                              |                                               |           |              |                            |               |
|---------|------------------------------------------------------------------------------|-----------------------------------------------|-----------|--------------|----------------------------|---------------|
|         | carbaldehyde                                                                 |                                               |           |              | solutions                  |               |
| 99.6%   | 1-(2-fluorophenyl)-2,5-dimethylpyrrole-3-carbaldehyde                        | $5 \cdot 10^{-5} - 5 \cdot 10^{-3} \text{ M}$ | 0.5 M HCl | 80.6-96.0    | PDP on deaerated solutions | <sup>69</sup> |
| 99.57%  | 3-(10-sodiumsulfonate decyloxy) aniline monomer                              | 1-10 ppm                                      | 0.5 M HCl | 26.2-49.9    | WL and PDP at 30 °C        | <sup>70</sup> |
| 99.57%  | Poly[3-(decyloxy sulfonic acid) aniline]                                     | 1-10 ppm                                      | 0.5 M HCl | 32.7-59.3    | WL and PDP at 30 °C        | <sup>70</sup> |
| 99.57%  | 3-(12-sodiumsulfonate dodecyloxy) aniline monomer                            | 1-10 ppm                                      | 0.5 M HCl | 25.8-50.0    | WL and PDP at 30 °C        | <sup>71</sup> |
| 99.57%  | 3-(12-sodiumsulfonate dodecyloxy) aniline monomer                            | 1-10 ppm                                      | 0.5 M HCl | 26.5-43.9*   | PDP at 40 °C               | <sup>71</sup> |
| 99.57%  | 3-(12-sodiumsulfonate dodecyloxy) aniline monomer                            | 1-10 ppm                                      | 0.5 M HCl | 24.6-34.2*   | PDP at 50 °C               | <sup>71</sup> |
| 99.57%  | 3-(12-sodiumsulfonate dodecyloxy) aniline monomer                            | 1-10 ppm                                      | 0.5 M HCl | 13.7-18.8*   | PDP at 60 °C               | <sup>71</sup> |
| 99.57%  | Poly 3-(dodecyloxy sulfonic acid) aniline                                    | 1-10 ppm                                      | 0.5 M HCl | 35.5-56.1*   | WL and PDP at 30 °C        | <sup>71</sup> |
| 99.57%  | Poly 3-(dodecyloxy sulfonic acid) aniline                                    | 1-10 ppm                                      | 0.5 M HCl | 30.2-47.5*   | PDP at 40 °C               | <sup>71</sup> |
| 99.57%  | Poly 3-(dodecyloxy sulfonic acid) aniline                                    | 1-10 ppm                                      | 0.5 M HCl | 23.3-33.2*   | PDP at 50 °C               | <sup>71</sup> |
| 99.57%  | Poly 3-(dodecyloxy sulfonic acid) aniline                                    | 1-10 ppm                                      | 0.5 M HCl | 19.2-23.0*   | PDP at 60 °C               | <sup>71</sup> |
| 99.57%  | Poly 3-dodecyloxy aniline                                                    | 1-10 ppm                                      | 0.5 M HCl | 60.3-88.7    | PDP at 30 °C               | <sup>72</sup> |
| 99.57%  | Poly 3-dodecyloxy aniline                                                    | 1-10 ppm                                      | 0.5 M HCl | 44.9-66.7    | PDP at 40 °C               | <sup>72</sup> |
| 99.57%  | Poly 3-dodecyloxy aniline                                                    | 1-10 ppm                                      | 0.5 M HCl | 28.8-45.9    | PDP at 50 °C               | <sup>72</sup> |
| 99.57%  | Poly 3-dodecyloxy aniline                                                    | 1-10 ppm                                      | 0.5 M HCl | 19.4-33.1    | PDP at 60 °C               | <sup>72</sup> |
| 99.555% | 1-phenyl-2-(2-phenyl hydrazono)-2-(phenylsulfonyl)ethan-one                  | $1 \cdot 10^{-6} - 1 \cdot 10^{-4} \text{ M}$ | 0.5 M HCl | 36.7-75.4    | PDP, EIS and EFM at 25 °C  | <sup>73</sup> |
| 99.555% | 2-(2-(40-methylbiphenyl-4-yl)hydrazono)-1-phenyl-2-(phenyl sulfonyl)ethanone | $1 \cdot 10^{-6} - 1 \cdot 10^{-4} \text{ M}$ | 0.5 M HCl | 44.6-84.2    | PDP, EIS and EFM at 25 °C  | <sup>73</sup> |
| 99.555% | 2-(2-(40-methoxybiphenyl-4-yl)hydrazono)-1-phenyl-2-(phenylsulfonyl)ethanone | $1 \cdot 10^{-6} - 1 \cdot 10^{-4} \text{ M}$ | 0.5 M HCl | 50.7-88.2    | PDP, EIS and EFM at 25 °C  | <sup>73</sup> |
| 99.555% | 1-phenyl-2-(2-phenyl hydrazono)-2-(phenylsulfonyl)ethan-one                  | $1 \cdot 10^{-4} \text{ M}$                   | 0.5 M HCl | 73.96-75.98* | EFM at 25-55 °C            | <sup>73</sup> |
| 99.555% | 2-(2-(40-methylbiphenyl-4-yl)hydrazono)-1-phenyl-2-(phenyl sulfonyl)ethanone | $1 \cdot 10^{-4} \text{ M}$                   | 0.5 M HCl | 78.85-80.83* | EFM at 25-55 °C            | <sup>73</sup> |



|         |                                                                              |                                             |           |              |                                            |    |
|---------|------------------------------------------------------------------------------|---------------------------------------------|-----------|--------------|--------------------------------------------|----|
| 99.555% | 2-(2-(40-methoxybiphenyl-4-yl)hydrazono)-1-phenyl-2-(phenylsulfonyl)ethanone | $1 \cdot 10^{-4}$ M                         | 0.5 M HCl | 86.23–87.86* | EFM at 25–55 °C                            | 73 |
| 99.535% | 2-acetyl pyridine-(4-phenylthiosemicarbazone)                                | $0.2\text{--}5 \cdot 10^{-4}$ M             | 0.1 M HCl | 1.55–75.92   | WL at 30 °C                                | 74 |
| 99.535% | 2-acetyl pyridine-(4-phenylthiosemicarbazone)                                | $0.1\text{--}5 \cdot 10^{-4}$ M             | 0.1 M HCl | 4.48–56.12   | WL at 40 °C                                | 74 |
| 99.535% | 2-acetyl pyridine-(4-phenyl-iso-methylthiosemicarbazone)                     | $0.5\text{--}5 \cdot 10^{-4}$ M             | 0.1 M HCl | 8.83–75.89   | WL at 30 °C                                | 74 |
| 99.535% | 2-acetyl pyridine-(4-phenyl-iso-methylthiosemicarbazone)                     | $0.1 \cdot 10^{-4}$ M                       | 0.1 M HCl | 15.53        | WL at 40 °C                                | 74 |
| 99.535% | 2-acetyl pyridine-(4-phenyl-iso-methylthiosemicarbazone)                     | $5 \cdot 10^{-4}$ M                         | 0.1 M HCl | 55.64        | WL at 40 °C                                | 74 |
| 99.535% | 2-acetyl pyridine-(4-phenyl-iso-ethylthiosemicarbazone)                      | $0.5\text{--}5 \cdot 10^{-4}$ M             | 0.1 M HCl | 23.66–73.58  | WL at 30 °C                                | 74 |
| 99.535% | 2-acetyl pyridine-(4-phenyl-iso-ethylthiosemicarbazone)                      | $0.5\text{--}5 \cdot 10^{-4}$ M             | 0.1 M HCl | 0.01–57.63   | WL at 40 °C                                | 74 |
| 99.535% | Hexadecyltrimethyl ammonium chloride                                         | $5 \cdot 10^{-4}$ M                         | 1 M HCl   | 91.7         | WL and polarisation at 30 °C, thermometric | 75 |
| 99.535% | Dodecyltrimethyl ammonium chloride                                           | $5 \cdot 10^{-4}$ M                         | 1 M HCl   | 71.7         | WL and polarisation at 30 °C, thermometric | 75 |
| 99.535% | Dimethyl dioctadecyl ammonium bromide                                        | $5 \cdot 10^{-4}$ M                         | 1 M HCl   | 78.9         | WL and polarisation at 30 °C, thermometric | 75 |
| 99.535% | Dodecyltrimethyl ammonium chloride                                           | $1 \cdot 10^{-5}\text{--}1 \cdot 10^{-3}$ M | 1 M HCl   | 24.3–82.6    | Thermometric and polarisation at 30 °C     | 75 |
| 99.535% | 3-methyl benzaldehyde, 2-hydroxy benzoyl-hydrazone                           | $1 \cdot 10^{-6}\text{--}1 \cdot 10^{-3}$ M | 2 N HCl   | 66.3–93.4    | Thermometric and polarisation at 30–55 °C  | 76 |
| 99.535% | 3-hydroxybenzaldehyde, 2-hydroxy benzoyl-hydrazone                           | $1 \cdot 10^{-6}\text{--}1 \cdot 10^{-3}$ M | 2 N HCl   | 75.3–96.2    | Thermometric and polarisation at 30–55 °C  | 76 |
| 99.535% | 4-bromo benzaldehyde, 2-hydroxy benzoyl-hydrazone                            | $1 \cdot 10^{-6}\text{--}1 \cdot 10^{-3}$ M | 2 N HCl   | 67.4–94.6    | Thermometric and polarisation at 30–55 °C  | 76 |
| 99.535% | Benzaldehyde, 2-hydroxy benzoyl-hydrazone                                    | $1 \cdot 10^{-6}\text{--}1 \cdot 10^{-3}$ M | 2 N HCl   | 67.0–92.7    | Thermometric and polarisation at 30–55 °C  | 76 |

|         |                                                                     |                                         |         |             |                                             |    |
|---------|---------------------------------------------------------------------|-----------------------------------------|---------|-------------|---------------------------------------------|----|
| 99.535% | <i>N</i> , 3-diphenylpropanamide                                    | $1-11 \cdot 10^{-5}$ M                  | 2 M HCl | 69.2–91.4   | WL after 1 h immersion and GSP at 25 °C     | 77 |
| 99.535% | 3-(4-chlorophenyl)- <i>N</i> -phenylpropanamide                     | $1-11 \cdot 10^{-5}$ M                  | 2 M HCl | 86.7–97.3   | WL after 1 h immersion and GSP at 25 °C     | 77 |
| 99.535% | <i>N</i> -phenyl-3-( <i>p</i> -tolyl)propanamide                    | $1-11 \cdot 10^{-5}$ M                  | 2 M HCl | 88.0–97.9   | WL after 1 h immersion and GSP at 25 °C     | 77 |
| 99.535% | 3-(4-methoxyphenyl)- <i>N</i> -phenylpropanamide                    | $1-11 \cdot 10^{-5}$ M                  | 2 M HCl | 90.1–99.4   | WL after 1 h immersion and GSP at 25 °C     | 77 |
| 99.535% | $\beta$ -(piperidino)- <i>p</i> -methoxy-propiofenone hydrochloride | $1-11 \cdot 10^{-5}$ M                  | 2 M HCl | 73.3–95.1   | WL after 105 min immersion and GSP at 25 °C | 78 |
| 99.535% | $\beta$ -(piperidino)- <i>p</i> -methyl-propiofenone hydrochloride  | $1-11 \cdot 10^{-5}$ M                  | 2 M HCl | 54.9–93.8   | WL after 105 min immersion at 25 °C         | 78 |
| 99.535% | $\beta$ -(piperidino)- <i>p</i> -hydroxy-propiofenone hydrochloride | $1-11 \cdot 10^{-5}$ M                  | 2 M HCl | 71.6–85.8   | WL after 105 min immersion at 25 °C         | 78 |
| 99.535% | $\beta$ -(piperidino) propiofenone hydrochloride                    | $1-11 \cdot 10^{-5}$ M                  | 2 M HCl | 37.2–78.4   | WL after 105 min immersion at 25 °C         | 78 |
| 99.53%  | Ethyl trimethyl ammonium bromide                                    | $1.0 \cdot 10^{-6}-1.1 \cdot 10^{-5}$ M | 1 M HCl | 52.50–68.90 | WL and GSP at 30 °C                         | 79 |
| 99.53%  | Ethyl trimethyl ammonium bromide                                    | $1.0 \cdot 10^{-6}-1.1 \cdot 10^{-5}$ M | 1 M HCl | 10.9–41.3   | WL at 35 °C                                 | 79 |
| 99.53%  | Ethyl trimethyl ammonium bromide                                    | $1.0 \cdot 10^{-6}-1.1 \cdot 10^{-5}$ M | 1 M HCl | 10.4–30.3   | WL at 40 °C                                 | 79 |
| 99.53%  | Ethyl trimethyl ammonium bromide                                    | $1.0 \cdot 10^{-6}-1.1 \cdot 10^{-5}$ M | 1 M HCl | 9.2–29.3    | WL at 45 °C                                 | 79 |
| 99.53%  | Ethyl trimethyl ammonium bromide                                    | $1.0 \cdot 10^{-6}-1.1 \cdot 10^{-5}$ M | 1 M HCl | 9.0–27.3    | WL at 50 °C                                 | 79 |
| 99.53%  | Ethyl trimethyl ammonium bromide + $10^{-4}$ M I <sup>-</sup>       | $1.0 \cdot 10^{-6}-1.1 \cdot 10^{-5}$ M | 1 M HCl | 77.0–85.0   | WL at 30 °C                                 | 79 |
| 99.53%  | Ethyl trimethyl ammonium bromide + $10^{-4}$ M SCN <sup>-</sup>     | $1.0 \cdot 10^{-6}-1.1 \cdot 10^{-5}$ M | 1 M HCl | 59.8–75.0   | WL at 30 °C                                 | 79 |
| 99.53%  | Ethyl trimethyl ammonium bromide + $10^{-4}$ M Br <sup>-</sup>      | $1.0 \cdot 10^{-6}-1.1 \cdot 10^{-5}$ M | 1 M HCl | 58.8–       | WL at 30 °C                                 | 79 |

|        |                                                    |                        |           |              |                                            |               |
|--------|----------------------------------------------------|------------------------|-----------|--------------|--------------------------------------------|---------------|
|        |                                                    | $\cdot 10^{-5}$ M      |           | 73.1         |                                            |               |
| 99.5%  | Sodium dodecyl benzene sulfonate                   | 15–75 ppm              | 0.1 M HCl | 44.06–78.17* | PSP at 30 °C                               | <sup>80</sup> |
| 99.5%  | Sodium dodecyl benzene sulfonate                   | 15–75 ppm              | 0.1 M HCl | 63.72–85.02* | PSP at 45 °C                               | <sup>80</sup> |
| 99.5%  | Sodium dodecyl benzene sulfonate                   | 15–75 ppm              | 0.1 M HCl | 47.86–62.40* | PSP at 60 °C                               | <sup>80</sup> |
| 99.39% | Octyl sulphate sodium salt                         | $1-11 \cdot 10^{-6}$ M | 1 M HCl   | 56.5–71.3    | WL at 30 °C                                | <sup>81</sup> |
| 99.39% | Decyl sulphate sodium salt                         | $1-11 \cdot 10^{-6}$ M | 1 M HCl   | 65.6–71.3    | WL at 30 °C                                | <sup>81</sup> |
| 99.39% | Dodecyl sulphate sodium salt                       | $1-11 \cdot 10^{-6}$ M | 1 M HCl   | 70.5–79.5    | WL at 30 °C                                | <sup>81</sup> |
| 99.39% | Hexadecyl sulphate sodium salt                     | $1-11 \cdot 10^{-6}$ M | 1 M HCl   | 76.2–81.1    | WL at 30 °C                                | <sup>81</sup> |
| 99.39% | Dodecyl benzene sulfonate                          | $1-11 \cdot 10^{-6}$ M | 1 M HCl   | 77.0–88.1    | WL and GSP at 30 °C                        | <sup>81</sup> |
| 99.39% | Octyl sulphate sodium salt + 0.01 M KI             | $1-11 \cdot 10^{-6}$ M | 1 M HCl   | 79.4–85.2    | WL at 30 °C                                | <sup>81</sup> |
| 99.39% | Decyl sulphate sodium salt + 0.01 M KI             | $1-11 \cdot 10^{-6}$ M | 1 M HCl   | 79.5–85.2    | WL at 30 °C                                | <sup>81</sup> |
| 99.39% | Dodecyl sulphate sodium salt + 0.01 M KI           | $1-11 \cdot 10^{-6}$ M | 1 M HCl   | 80.3–86.9    | WL at 30 °C                                | <sup>81</sup> |
| 99.39% | Hexadecyl sulphate sodium salt + 0.01 M KI         | $1-11 \cdot 10^{-6}$ M | 1 M HCl   | 83.6–87.7    | WL at 30 °C                                | <sup>81</sup> |
| 99.39% | Dodecyl benzene sulfonate + 0.01 M KI              | $1-11 \cdot 10^{-6}$ M | 1 M HCl   | 85.2–90.9    | WL at 30 °C                                | <sup>81</sup> |
| 99.25% | Hexamethylenetetramine                             | 300 ppm                | 2 M HCl   | 65.0         | Tafel extrapolation, $R_p$ and WL at 20 °C | <sup>82</sup> |
| 99.25% | Hexamethylenetetramine                             | 600 ppm                | 2 M HCl   | 79.8         | Tafel extrapolation, $R_p$ and WL at 20 °C | <sup>82</sup> |
| 99.25% | Hexamethylenetetramine + 500 ppm CaCl <sub>2</sub> | 300 ppm                | 2 M HCl   | 97.4         | Tafel extrapolation, $R_p$ and WL at 20 °C | <sup>82</sup> |
| 99.25% | Hexamethylenetetramine + 20 ppm KI                 | 600 ppm                | 2 M HCl   | 99.0         | Tafel extrapolation, $R_p$ and WL at 20 °C | <sup>82</sup> |

|         |                                                                             |                                         |           |             |                                      |               |
|---------|-----------------------------------------------------------------------------|-----------------------------------------|-----------|-------------|--------------------------------------|---------------|
| 99.19%  | 1,5-bis[2-(2-hydroxybenzylideneamino)phenoxy]-3-oxopentane                  | 10–100 ppm                              | 0.1 M HCl | 44.0–66.2   | EIS and Tafel extrapolation at 25 °C | <sup>83</sup> |
| 99.19%  | 1,5-bis[2-(5-chloro-2-hydroxybenzylideneamino)phenoxy]-3-oxopentane         | 10–100 ppm                              | 0.1 M HCl | 45.3–68.5   | EIS and Tafel extrapolation at 25 °C | <sup>83</sup> |
| 99.19%  | 1,5-bis[2-(5-bromo-2-hydroxybenzylideneamino)phenoxy]-3-oxopentane          | 10–100 ppm                              | 0.1 M HCl | 56.1–74.0   | EIS and Tafel extrapolation at 25 °C | <sup>83</sup> |
| 99.16%  | Tetradecylpyridinium bromide                                                | 0.2–1.0 mM                              | 1 M HCl   | 90.6–97.4   | PDP and EIS at 20 °C                 | <sup>84</sup> |
| 99.145% | 1,8- bis[2-(5-chloro-2-hydroxybenzylideneamino)phenoxy]-3,6dioxooctane (TC) | 0.01–0.10 mM                            | 0.1 M HCl | 58.8–74.8   | PDP at 25 °C                         | <sup>85</sup> |
| 99.145% | 1,8- bis[2-(5-bromo-2-hydroxybenzylideneamino)phenoxy]-3,6dioxooctane (TB)  | 0.01–0.10 mM                            | 0.1 M HCl | 62.5–83.5   | PDP at 25 °C                         | <sup>85</sup> |
| 99.145% | 1,8- bis[2-(5-chloro-2-hydroxybenzylideneamino)phenoxy]-3,6dioxooctane (TC) | 0.10 mM                                 | 0.1 M HCl | 70.2        | EQCM at 25 °C                        | <sup>85</sup> |
| 99.145% | 1,8- bis[2-(5-bromo-2-hydroxybenzylideneamino)phenoxy]-3,6dioxooctane (TB)  | 0.10 mM                                 | 0.1 M HCl | 85.2        | EQCM at 25 °C                        | <sup>85</sup> |
| 99.145% | 2-[2-aza-2-(5-methyl(2-pyridyl))vinyl]-4-bromophenol                        | $5 \cdot 10^{-5}$ – $5 \cdot 10^{-3}$ M | 0.1 M HCl | 18.1–84.3   | PDP, EIS and $R_p$ at 25 °C          | <sup>86</sup> |
| 99.145% | 2-[2-aza-2-(5-methyl(2-pyridyl))vinyl]-4-chlorophenol                       | $5 \cdot 10^{-5}$ – $5 \cdot 10^{-4}$ M | 0.1 M HCl | 22.6–78.6   | PDP, EIS and $R_p$ at 25 °C          | <sup>86</sup> |
| 99.11%  | 3-amino 1,2,4 triazole                                                      | 1–100 mM                                | 1 M HCl   | 58.1–93.4   | WL after 2 h immersion at 30 °C      | <sup>87</sup> |
| 99.11%  | 3-amino 1,2,4 triazole                                                      | 10–100 mM                               | 1 M HCl   | 73.6–93.1   | PDP                                  | <sup>87</sup> |
| 99.10%  | Aniline, N-benzylidene                                                      | $10^{-5}$ – $10^{-2}$                   | 2 N HCl   | 54.0–88.0   | Tafel extrapolation at 30 °C         | <sup>88</sup> |
| 99.10%  | Ethylenediamine , N, N' - dibenzylidene                                     | $10^{-5}$ – $10^{-2}$ M                 | 2 N HCl   | 56.0–89.0   | Tafel extrapolation at 30 °C         | <sup>88</sup> |
| 99.10%  | Aniline, N-(p-methoxybenzylidene)                                           | $10^{-5}$ – $10^{-2}$ M                 | 2 N HCl   | 70.0–94.0   | Tafel extrapolation at 30 °C         | <sup>88</sup> |
| 99.10%  | Ethylenediamine , N, N' - di(p-methoxybenzylidene)                          | $10^{-5}$ – $10^{-2}$ M                 | 2 N HCl   | 66.0–90.0   | Tafel extrapolation at 30 °C         | <sup>88</sup> |
| 99%     | Benzoxazole-2-tione                                                         | $1 \cdot 10^{-5}$ – $1 \cdot 10^{-3}$ M | 0.1 M HCl | 47.50–68.40 | PSP at 20 °C                         | <sup>89</sup> |

|       |                                                                                                                 |                                               |           |             |                          |               |
|-------|-----------------------------------------------------------------------------------------------------------------|-----------------------------------------------|-----------|-------------|--------------------------|---------------|
| 99%   | Benzimidazole-2-tione                                                                                           | $1 \cdot 10^{-5} - 1 \cdot 10^{-3} \text{ M}$ | 0.1 M HCl | 60.10–80.90 | PSP at 20 °C             | <sup>89</sup> |
| 99%   | 5-methyl benzoxazole-2-tione                                                                                    | $1 \cdot 10^{-5} - 1 \cdot 10^{-3} \text{ M}$ | 0.1 M HCl | 52.10–73.70 | PSP at 20 °C             | <sup>89</sup> |
| 99%   | 5-methyl-benzimidazole-2-tione                                                                                  | $1 \cdot 10^{-5} - 1 \cdot 10^{-3} \text{ M}$ | 0.1 M HCl | 58.20–77.00 | PSP at 20 °C             | <sup>89</sup> |
| 99%   | 5-chloro benzoxazole-2-tione                                                                                    | $1 \cdot 10^{-5} - 1 \cdot 10^{-3} \text{ M}$ | 0.1 M HCl | 36.90–60.20 | PSP at 20 °C             | <sup>89</sup> |
| 99%   | 5-chloro-benzimidazole-2-tione                                                                                  | $1 \cdot 10^{-5} - 1 \cdot 10^{-3} \text{ M}$ | 0.1 M HCl | 47.40–68.30 | PSP at 20 °C             | <sup>89</sup> |
| 99%   | 5-nitro benzoxazole-2-tione                                                                                     | $1 \cdot 10^{-5} - 1 \cdot 10^{-3} \text{ M}$ | 0.1 M HCl | 27.50–71.20 | PSP at 20 °C             | <sup>89</sup> |
| 99%   | Benzoxazole-2-tione                                                                                             | $1 \cdot 10^{-5} - 1 \cdot 10^{-3} \text{ M}$ | 0.1 M HCl | 16.8–68.4   | PSP at 40-60 °C          | <sup>89</sup> |
| 99%   | Benzimidazole-2-tione                                                                                           | $1 \cdot 10^{-5} - 1 \cdot 10^{-3} \text{ M}$ | 0.1 M HCl | 4.49–80.90  | PSP at 20-60 °C          | <sup>89</sup> |
| 99%   | 5-methyl benzoxazole-2-tione                                                                                    | $1 \cdot 10^{-5} - 1 \cdot 10^{-3} \text{ M}$ | 0.1 M HCl | 20.60–73.70 | PSP at 40-60 °C          | <sup>89</sup> |
| 99%   | 5-methyl-benzimidazole-2-tione                                                                                  | $1 \cdot 10^{-5} - 1 \cdot 10^{-3} \text{ M}$ | 0.1 M HCl | 8.80–77.00  | PSP at 20-60 °C          | <sup>89</sup> |
| 99%   | 5-chloro benzoxazole-2-tione                                                                                    | $1 \cdot 10^{-5} - 1 \cdot 10^{-3} \text{ M}$ | 0.1 M HCl | 8.80–60.20  | PSP at 40-60 °C          | <sup>89</sup> |
| 99%   | 5-chloro-benzimidazole-2-tion                                                                                   | $1 \cdot 10^{-5} - 1 \cdot 10^{-3} \text{ M}$ | 0.1 M HCl | 4.50–68.30  | PSP at 20-60 °C          | <sup>89</sup> |
| 99%   | 5-nitro benzoxazole-2-tione                                                                                     | $1 \cdot 10^{-5} - 1 \cdot 10^{-3} \text{ M}$ | 0.1 M HCl | 4.50–71.20  | PSP at 40-60 °C          | <sup>89</sup> |
| 99.0% | Hexanediyl-1,6,bis-(diethyl alkyl ammonium bromide) - C <sub>10</sub> C <sub>6</sub> C <sub>10</sub> (Et) · 2Br | $10^{-4} - 10^{-3} \text{ M}$                 | 1 M HCl   | 23.3–95.1   | WL and HE at 25 °C       | <sup>90</sup> |
| 99.0% | Hexanediyl-1,6,bis-(diethyl alkyl ammonium bromide) - C <sub>12</sub> C <sub>6</sub> C <sub>12</sub> (Et) · 2Br | $10^{-4} - 10^{-3} \text{ M}$                 | 1 M HCl   | 24.7–95.4   | WL and HE at 25 °C       | <sup>90</sup> |
| 99.0% | Hexanediyl-1,6,bis-(diethyl alkyl ammonium bromide) - C <sub>14</sub> C <sub>6</sub> C <sub>14</sub> (Et) · 2Br | $10^{-4} - 10^{-3} \text{ M}$                 | 1 M HCl   | 25.3–96.5   | WL and HE at 25 °C       | <sup>90</sup> |
| 99.0% | Hexanediyl-1,6,bis-(diethyl alkyl ammonium bromide) - C <sub>16</sub> C <sub>6</sub> C <sub>16</sub> (Et) · 2Br | $10^{-4} - 10^{-3} \text{ M}$                 | 1 M HCl   | 27.6–98.2   | WL and HE at 25 °C       | <sup>90</sup> |
| 99%   | Benzylidene-2-methoxy-phenyl-amine                                                                              | $5 \cdot 10^{-4} - 1 \cdot 10^{-2} \text{ M}$ | 1 M HCl   | 24.98–99.80 | WL, PDP and EIS at 25 °C | <sup>91</sup> |
| 99%   | 2-methoxy-phenyl-4-methyl-benzylidene-amine                                                                     | $5 \cdot 10^{-4} - 1 \cdot 10^{-2} \text{ M}$ | 1 M HCl   | 2.77–98.43  | WL, PDP and EIS at 25 °C | <sup>91</sup> |
| 99%   | 4-chloro-benzylidene-2-methoxy-phenyl-amine                                                                     | $5 \cdot 10^{-4} - 1 \cdot 10^{-2} \text{ M}$ | 1 M HCl   | 47.16–96.06 | WL, PDP and EIS at 25 °C | <sup>91</sup> |
| 99%   | 4-nitro-benzylidene-2-methoxy-phenyl-amine                                                                      | $5 \cdot 10^{-4} - 1 \cdot 10^{-2} \text{ M}$ | 1 M HCl   | 17.03–84.40 | WL, PDP and EIS at 25 °C | <sup>91</sup> |
| 99%   | Benzylidene-2-methoxy-phenyl-amine                                                                              | 0.01 M                                        | 1 M HCl   | 93.41–      | PDP at 25–45             | <sup>91</sup> |

|         |                                                           |                        |                    |                 |                                            |               |
|---------|-----------------------------------------------------------|------------------------|--------------------|-----------------|--------------------------------------------|---------------|
|         |                                                           |                        |                    | 99.81           | °C                                         |               |
| 99%     | 2-methoxy-phenyl-4-methyl-benzylidene-amine               | 0.1 M                  | 1 M HCl            | 87.91–<br>98.43 | PDP at 25–45<br>°C                         | <sup>91</sup> |
| 99%     | 4-chloro-benzylidene-2-methoxy-phenyl-amine               | 0.01 M                 | 1 M HCl            | 93.34–<br>96.06 | PDP at 25–45<br>°C                         | <sup>91</sup> |
| 99%     | 4-nitro-benzylidene-2-methoxy-phenyl-amine                | 0.01 M                 | 1 M HCl            | 35.60–<br>96.06 | PDP at 25–45<br>°C                         | <sup>91</sup> |
| > 98.8% | 3-(4-hydroxyphenyl)-1-phenylprop-2-en-1-one               | $1-21 \cdot 10^{-6}$ M | 0.5 M HCl          | 55.50–<br>89.44 | WL, PDP, EIS<br>and EFM at<br>25 °C        | <sup>92</sup> |
| > 98.8% | 3-(4-hydroxyphenyl)-1-(4-nitrophenyl)prop-2-en-1-one      | $1-21 \cdot 10^{-6}$ M | 0.5 M HCl          | 68.75–<br>99.02 | WL, PDP, EIS<br>and EFM at<br>25 °C        | <sup>92</sup> |
| 98.70%  | Glutamic acid                                             | 0.0004 M               | 0.20–1.00 M<br>HCl | 2.63–<br>25.00  | WL, HE at 30–<br>50 °C and<br>thermometric | <sup>93</sup> |
| 98.70%  | Glutamic acid                                             | 0.0008 M               | 0.20–1.00 M<br>HCl | 3.50–<br>41.67  | WL, HE at 30–<br>50 °C and<br>thermometric | <sup>93</sup> |
| 98.70%  | Glutamic acid                                             | 0.0012 M               | 0.20–1.00 M<br>HCl | 5.25–<br>51.67  | WL, HE at 30–<br>50 °C and<br>thermometric | <sup>93</sup> |
| 98.70%  | Glutamic acid                                             | 0.0016 M               | 0.20–1.00 M<br>HCl | 7.35–<br>52.00  | WL, HE at 30–<br>50 °C and<br>thermometric | <sup>93</sup> |
| 98.70%  | Glutamic acid                                             | 0.0020 M               | 0.20–1.00 M<br>HCl | 9.94–<br>66.67  | WL, HE at 30–<br>50 °C and<br>thermometric | <sup>93</sup> |
| 98.5%   | Polyvinyl pyrrolidone                                     | $1 \cdot 10^{-4}$ M    | 2 M HCl            | 36.0–<br>69.0   | HE at 30–60<br>°C                          | <sup>94</sup> |
| 98.5%   | Polyacrylamide                                            | $1 \cdot 10^{-4}$ M    | 2 M HCl            | 42.0–<br>72.0   | HE at 30–60<br>°C                          | <sup>94</sup> |
| 98.5%   | Polyvinyl pyrrolidone + polyacrylamide (1: 1 mixture v/v) | $1 \cdot 10^{-4}$ M    | 2 M HCl            | 31.0–<br>58.0   | HE at 30–60<br>°C                          | <sup>94</sup> |
| 98.5%   | Polyvinyl pyrrolidone + polyacrylamide (1: 2 mixture v/v) | $1 \cdot 10^{-4}$ M    | 2 M HCl            | 29.0–<br>56.0   | HE at 30–60<br>°C                          | <sup>94</sup> |
| 98.5%   | Polyvinyl pyrrolidone + polyacrylamide (1: 3 mixture v/v) | $1 \cdot 10^{-4}$ M    | 2 M HCl            | 23.0–<br>47.0   | HE at 30–60<br>°C                          | <sup>94</sup> |
| 98.5%   | Polyvinyl pyrrolidone + polyacrylamide (2: 1 mixture v/v) | $1 \cdot 10^{-4}$ M    | 2 M HCl            | 36.0–<br>58.0   | HE at 30–60<br>°C                          | <sup>94</sup> |
| 98.5%   | Polyvinyl pyrrolidone + polyacrylamide (3: 1 mixture v/v) | $1 \cdot 10^{-4}$ M    | 2 M HCl            | 44.0–<br>65.0   | HE at 30–60<br>°C                          | <sup>94</sup> |
| 98.5%   | Polyvinyl pyrrolidone                                     | $1 \cdot 10^{-4}$ M    | 2 M HCl            | 77.0            | Thermometric                               | <sup>94</sup> |
| 98.5%   | Polyacrylamide                                            | $1 \cdot 10^{-4}$ M    | 2 M HCl            | 77.0            | Thermometric                               | <sup>94</sup> |

|       |                                                           |                     |           |           |                                                   |               |
|-------|-----------------------------------------------------------|---------------------|-----------|-----------|---------------------------------------------------|---------------|
| 98.5% | Polyvinyl pyrrolidone + polyacrylamide (1: 1 mixture v/v) | $1 \cdot 10^{-4}$ M | 2 M HCl   | 78.0      | Thermometric                                      | <sup>94</sup> |
| 98.5% | Polyvinyl pyrrolidone + polyacrylamide (1: 2 mixture v/v) | $1 \cdot 10^{-4}$ M | 2 M HCl   | 76.0      | Thermometric                                      | <sup>94</sup> |
| 98.5% | Polyvinyl pyrrolidone + polyacrylamide (1: 3 mixture v/v) | $1 \cdot 10^{-4}$ M | 2 M HCl   | 14.0      | Thermometric                                      | <sup>94</sup> |
| 98.5% | Polyvinyl pyrrolidone + polyacrylamide (2: 1 mixture v/v) | $1 \cdot 10^{-4}$ M | 2 M HCl   | 51.0      | Thermometric                                      | <sup>94</sup> |
| 98.5% | Polyvinyl pyrrolidone + polyacrylamide (3: 1 mixture v/v) | $1 \cdot 10^{-4}$ M | 2 M HCl   | 97.0      | Thermometric                                      | <sup>94</sup> |
| 98.5% | Polyvinyl pyrrolidone                                     | $1 \cdot 10^{-4}$ M | 0.1 M HCl | 24.0–47.0 | WL at 30–60 °C                                    | <sup>94</sup> |
| 98.5% | Polyacrylamide                                            | $1 \cdot 10^{-4}$ M | 0.1 M HCl | 35.0–49.0 | WL at 30–60 °C                                    | <sup>94</sup> |
| 98.5% | Polyvinyl pyrrolidone + polyacrylamide (1: 1 mixture v/v) | $1 \cdot 10^{-4}$ M | 0.1 M HCl | 33.0–55.0 | WL at 30–60 °C                                    | <sup>94</sup> |
| 98.5% | Polyvinyl pyrrolidone + polyacrylamide (1: 2 mixture v/v) | $1 \cdot 10^{-4}$ M | 0.1 M HCl | 32.0–53.0 | WL at 30–60 °C                                    | <sup>94</sup> |
| 98.5% | Polyvinyl pyrrolidone + polyacrylamide (1: 3 mixture v/v) | $1 \cdot 10^{-4}$ M | 0.1 M HCl | 29.0–52.0 | WL at 30–60 °C                                    | <sup>94</sup> |
| 98.5% | Polyvinyl pyrrolidone + polyacrylamide (2: 1 mixture v/v) | $1 \cdot 10^{-4}$ M | 0.1 M HCl | 34.0–57.0 | WL at 30–60 °C                                    | <sup>94</sup> |
| 98.5% | Polyvinyl pyrrolidone + polyacrylamide (3: 1 mixture v/v) | $1 \cdot 10^{-4}$ M | 0.1 M HCl | 36.0–58.0 | WL at 30–60 °C                                    | <sup>94</sup> |
| 98.5% | 2-anisaldine-pyridine                                     | 0.2–0.6 wt.%        | 1–2 M HCl | 18.7–98.8 | WL after 24 h immersion and thermometric at 25 °C | <sup>95</sup> |
| 98.5% | 2-anisaldine-pyridine                                     | 0.2–0.6 wt.%        | 3–4 M HCl | 50.4–99.0 | WL after 1 h immersion and thermometric at 25 °C  | <sup>95</sup> |
| 98.5% | 2-anisaldine-pyrimidine                                   | 0.2–0.6 wt.%        | 1–2 M HCl | 65.5–98.0 | WL after 24 h immersion and thermometric at 25 °C | <sup>95</sup> |
| 98.5% | 2-anisaldine-pyrimidine                                   | 0.2–0.6 wt.%        | 3–4 M HCl | 41.5–99.5 | WL after 1 h immersion and thermometric at 25 °C  | <sup>95</sup> |
| 98.5% | 2-salicylidine-pyridine                                   | 0.2–0.6 wt.%        | 1–2 M HCl | 90.0–98.8 | WL after 24 h immersion and thermometric          | <sup>95</sup> |

|        |                                                           |                                   |           |             | at 25 °C                                          |                |
|--------|-----------------------------------------------------------|-----------------------------------|-----------|-------------|---------------------------------------------------|----------------|
| 98.5%  | 2-salicylidine-pyridine                                   | 0.2–0.6 wt.%                      | 3–4 M HCl | 62.2–99.8   | WL after 1 h immersion and thermometric at 25 °C  | <sup>95</sup>  |
| 98.5%  | 2-salicylidine-pyrimidine                                 | 0.2–0.6 wt.%                      | 1–2 M HCl | 53.7–99.2   | WL after 24 h immersion and thermometric at 25 °C | <sup>95</sup>  |
| 98.5%  | 2-salicylidine-pyrimidine                                 | 0.2–0.6 wt.%                      | 3–4 M HCl | 84.8–98.8   | WL after 1 h immersion and thermometric at 25 °C  | <sup>95</sup>  |
| 97%    | N,N'-bis(2-hydroxybenzylidene)-1,3-diaminobenzene         | 0.1–10 mM                         | 0.5 M HCl | 34.19–70.61 | PDP                                               | <sup>97</sup>  |
| 97%    | N,N'-bis(4-bromobenzylidene)-1,3-diaminobenzene           | 0.1–10 mM                         | 0.5 M HCl | 66.50–89.76 | PDP                                               | <sup>97</sup>  |
| 97%    | N,N'-bis(2-hydroxy-5-bromobenzylidene)-1,3-diaminobenzene | 0.1–10 mM                         | 0.5 M HCl | 75.38–97.34 | PDP                                               | <sup>97</sup>  |
| 94.94% | <i>tris</i> (5-methyl-3-thioxo-1,3,4-thiadiazole) borate  | 20–100 ppm                        | 1 M HCl   | 65.61–89.03 | EIS and Tafel extrapolation at 25 °C              | <sup>98</sup>  |
| 94.44% | 1-methyl-4-[4'(-H)-styryl] pyridinium iodide              | $10^{-5}$ – $2.5 \cdot 10^{-4}$ M | 0.5 M HCl | 45.37–95.22 | PDP at 30 °C                                      | <sup>143</sup> |
| 94.44% | 1-methyl-4-[4'(-Cl)-styryl] pyridinium iodide             | $10^{-5}$ – $2.5 \cdot 10^{-4}$ M | 0.5 M HCl | 54.18–97.61 | PDP at 30 °C                                      | <sup>143</sup> |
| 94.44% | 1-methyl-4-[4'(-H)-styryl] pyridinium iodide              | $10^{-5}$ – $2.5 \cdot 10^{-4}$ M | 0.5 M HCl | 57.46–98.06 | PDP at 30 °C                                      | <sup>143</sup> |
| 94.44% | 1-methyl-4-[4'(-H)-styryl] pyridinium iodide              | $10^{-5}$ – $5 \cdot 10^{-4}$ M   | 0.5 M HCl | 35.98–98.12 | WL and EIS at 30 °C                               | <sup>143</sup> |
| 94.44% | 1-methyl-4-[4'(-Cl)-styryl] pyridinium iodide             | $10^{-5}$ – $5 \cdot 10^{-4}$ M   | 0.5 M HCl | 46.86–98.20 | WL and EIS at 30 °C                               | <sup>143</sup> |
| 94.44% | 1-methyl-4-[4'(-H)-styryl] pyridinium iodide              | $10^{-5}$ – $5 \cdot 10^{-4}$ M   | 0.5 M HCl | 48.89–98.24 | WL and EIS at 30 °C                               | <sup>143</sup> |
| 94.44% | 1-methyl-4-[4'(-H)-styryl] pyridinium iodide              | $5 \cdot 10^{-4}$ M               | 0.5 M HCl | 82.88–98.12 | WL at 30–70 °C                                    | <sup>143</sup> |
| 94.44% | 1-methyl-4-[4'(-Cl)-styryl] pyridinium iodide             | $5 \cdot 10^{-4}$ M               | 0.5 M HCl | 94.02–98.20 | WL at 30–70 °C                                    | <sup>143</sup> |
| 94.44% | 1-methyl-4-[4'(-H)-styryl] pyridinium iodide              | $5 \cdot 10^{-4}$ M               | 0.5 M HCl | 82.76–98.24 | WL at 30–70 °C                                    | <sup>143</sup> |
| 93.68% | Gasoil sulfonate                                          | 0.1–0.7 g/L                       | 1 M HCl   | 78.5–94.1   | WL at 20 °C                                       | <sup>99</sup>  |



|        |                                                          |                                         |           |             |                                    |                |
|--------|----------------------------------------------------------|-----------------------------------------|-----------|-------------|------------------------------------|----------------|
| 93.68% | Kerosene sulfonate                                       | 0.1–0.7 g/L                             | 1 M HCl   | 67.9–90.4   | WL at 20 °C                        | <sup>99</sup>  |
| 93.68% | Heavy solvent sulfonate                                  | 0.1–0.7 g/L                             | 1 M HCl   | 51.2–89.5   | WL at 20 °C                        | <sup>99</sup>  |
| 93.68% | Total gasoline sulfonate                                 | 0.1–0.7 g/L                             | 1 M HCl   | 41.1–86.9   | WL at 20 °C                        | <sup>99</sup>  |
| 93.68% | Gasoil sulfonate                                         | 0.5 g/L                                 | 1 M HCl   | 93.0        | Polarization and EIS at 20 °C      | <sup>99</sup>  |
| 93.68% | Kerosene sulfonate                                       | 0.5 g/L                                 | 1 M HCl   | 89.6        | Polarization and EIS at 20 °C      | <sup>99</sup>  |
| 93.68% | Heavy solvent sulfonate                                  | 0.5 g/L                                 | 1 M HCl   | 88.1        | Polarization and EIS at 20 °C      | <sup>99</sup>  |
| 93.68% | Total gasoline sulfonate                                 | 0.5 g/L                                 | 1 M HCl   | 85.1        | Polarization and EIS at 20 °C      | <sup>99</sup>  |
| 93.68% | Gasoil sulfonate                                         | 0.5 g/L                                 | 1 M HCl   | 61.77–93.98 | WL at 20–50 °C                     | <sup>99</sup>  |
| Pure   | Benzotriazole                                            | $1 \cdot 10^{-5}$ – $1 \cdot 10^{-3}$ M | 0.1 M HCl | 39.7–74.8   | PSP at 20 °C                       | <sup>100</sup> |
| Pure   | 5-methyl benzotriazole                                   | $1 \cdot 10^{-5}$ – $1 \cdot 10^{-3}$ M | 0.1 M HCl | 44.9–78.0   | PSP at 20 °C                       | <sup>100</sup> |
| Pure   | 5-chloro benzotriazole                                   | $1 \cdot 10^{-5}$ – $1 \cdot 10^{-3}$ M | 0.1 M HCl | 48.5–80.0   | PSP at 20 °C                       | <sup>100</sup> |
| Pure   | 5-nitro benzotriazole                                    | $1 \cdot 10^{-5}$ – $1 \cdot 10^{-3}$ M | 0.1 M HCl | 74.8–79.0   | PSP at 20 °C                       | <sup>100</sup> |
| Pure   | Hexadecylpyridinium bromide                              | 20–3000 ppm                             | 0.5 M HCl | 5.44–79.02  | Polarization at 25 °C              | <sup>101</sup> |
| Pure   | Polyoxyethylene (20) sorbitan monolaurate (Tween 20)     | 20–3000 ppm                             | 0.5 M HCl | 47.84–76.20 | Polarization at 25 °C              | <sup>101</sup> |
| Pure   | Polyoxyethylene (5) sorbitan monooleate (Tween 81)       | 20–3000 ppm                             | 0.5 M HCl | 32.00–80.19 | Polarization at 25 °C              | <sup>101</sup> |
| Pure   | N-benzylidene benzylamine                                | 0.001–0.50 vol.%                        | 1 M HCl   | 60.4–99.3   | WL after 1 h immersion at 35 °C    | <sup>102</sup> |
| Pure   | Benzenemethanamine- $\alpha$ -methyl-N-(phenylmethylene) | 0.001–0.50 vol.%                        | 1 M HCl   | 64.0–99.5   | WL after 1 h immersion at 35 °C    | <sup>102</sup> |
| Pure   | N-benzylidene benzylamine                                | 0.5 vol.%                               | 1 M HCl   | 95.5–99.3   | WL after 1 h immersion at 35–65 °C | <sup>102</sup> |
| Pure   | Benzenemethanamine- $\alpha$ -methyl-N-(phenylmethylene) | 0.5 vol.%                               | 1 M HCl   | 96.5–99.5   | WL after 1 h immersion at 35–65 °C | <sup>102</sup> |

|              |                                                          |                                             |           |             |                                     |                |
|--------------|----------------------------------------------------------|---------------------------------------------|-----------|-------------|-------------------------------------|----------------|
| Pure         | N-benzylidene benzylamine                                | 0.001 vol.%                                 | 1 M HCl   | 56.4        | GSP at 35 °C                        | <sup>102</sup> |
| Pure         | N-benzylidene benzylamine                                | 0.05 vol.%                                  | 1 M HCl   | 95.8        | GSP at 35 °C                        | <sup>102</sup> |
| Pure         | Benzenemethanamine- $\alpha$ -methyl-N-(phenylmethylene) | 0.001 vol.%                                 | 1 M HCl   | 80.1        | GSP at 35 °C                        | <sup>102</sup> |
| Pure         | Benzenemethanamine- $\alpha$ -methyl-N-(phenylmethylene) | 0.05 vol.%                                  | 1 M HCl   | 97.4        | GSP at 35 °C                        | <sup>102</sup> |
| Pure         | N-benzylidene benzylamine                                | 0.001–0.10 vol.%                            | 1 M HCl   | 59.2–91.9   | EIS at 35 °C                        | <sup>102</sup> |
| Pure         | Benzenemethanamine- $\alpha$ -methyl-N-(phenylmethylene) | 0.001–0.10 vol.%                            | 1 M HCl   | 64.4–94.1   | EIS at 35 °C                        | <sup>102</sup> |
| Al-pure      | <i>o</i> -chloroaniline-N-benzylidene                    | 0.001–0.50 vol.%                            | 1 M HCl   | 70.3–99.4   | WL and GSP at 35 °C                 | <sup>103</sup> |
| Al-pure      | <i>o</i> -chloroaniline-N-benzylidene                    | 0.50 vol.%                                  | 1 M HCl   | 96.6–99.4   | WL at 35–65 °C                      | <sup>103</sup> |
| Al-pure      | <i>o</i> -chloroaniline-N-benzylidene                    | 0.001–0.10 vol.%                            | 1 M HCl   | 68.2–94.2   | EIS at 35 °C                        | <sup>103</sup> |
| Al-pure      | <i>o</i> -anisidine-N-benzylidene                        | $1 \cdot 10^{-4}$ – $8 \cdot 10^{-1}$ w/v % | 1 M HCl   | 7.27–99.78  | WL, EIS and polarisation at 35 °C   | <sup>104</sup> |
| Al-pure      | <i>p</i> -anisidine-N-benzylidene                        | $1 \cdot 10^{-4}$ – $8 \cdot 10^{-1}$ w/v % | 1 M HCl   | 43.17–99.78 | WL, EIS and polarisation at 35 °C   | <sup>104</sup> |
| 2S (99.489%) | Xylenol orange                                           | 2–8 mM                                      | 0.6 M HCl | 63.13–83.92 | WL after 24 h immersion at 28 °C    | <sup>105</sup> |
| 2S (99.489%) | Xylenol orange                                           | 8 mM                                        | 0.5 M HCl | 76.70–92.15 | WL after 24 h immersion at 40–60 °C | <sup>105</sup> |
| 2S (99.489%) | Xylenol orange                                           | 8 mM                                        | 0.4 M HCl | 87.06       | WL after 24 h immersion and PDP     | <sup>105</sup> |
| 3SR (98.60%) | Polyethylene glycol                                      | $10^{-4}$ M                                 | 0.1 M HCl | 15–65       | WL and HE at 30–60 °C               | <sup>106</sup> |
| 3SR (98.60%) | Polyvinylpyrrolidone                                     | $10^{-4}$ M                                 | 0.1 M HCl | 29–73       | WL and HE at 30–60 °C               | <sup>106</sup> |
| 3SR (98.60%) | Polyethylene glycol:Polyvinylpyrrolidone (1:1 v/v)       | $10^{-4}$ M                                 | 0.1 M HCl | 24–66       | WL and HE at 30–60 °C               | <sup>106</sup> |
| 3SR (98.60%) | Polyethylene glycol:Polyvinylpyrrolidone (1:2 v/v)       | $10^{-4}$ M                                 | 0.1 M HCl | 36–73       | WL and HE at 30–60 °C               | <sup>106</sup> |
| 3SR (98.60%) | Polyethylene glycol:Polyvinylpyrrolidone (1:3 v/v)       | $10^{-4}$ M                                 | 0.1 M HCl | 42–80       | WL and HE at 30–60 °C               | <sup>106</sup> |
| 3SR (98.60%) | Polyethylene glycol:Polyvinylpyrrolidone (2:1 v/v)       | $10^{-4}$ M                                 | 0.1 M HCl | 21–56       | WL and HE at 30–60 °C               | <sup>106</sup> |
| 3SR          | Polyethylene glycol:Polyvinylpyrrolidone (3:1 v/v)       | $10^{-4}$ M                                 | 0.1 M HCl | 20–53       | WL and HE at                        | <sup>106</sup> |

|                      |                                               |                                         |           |             |                                             |                |
|----------------------|-----------------------------------------------|-----------------------------------------|-----------|-------------|---------------------------------------------|----------------|
| (98.60%)             |                                               |                                         |           |             | 30–60 °C                                    |                |
| AA1060               | Adenine                                       | 2–10 mM                                 | 0.1 M HCl | 71.73–90.58 | WL at 30 °C                                 | <sup>107</sup> |
| AA1060               | Guanine                                       | 2–10 mM                                 | 0.1 M HCl | 81.65–96.53 | WL at 30 °C                                 | <sup>107</sup> |
| AA1060               | Hypoxanthine                                  | 2–10 mM                                 | 0.1 M HCl | 82.84–92.23 | WL at 30 °C                                 | <sup>107</sup> |
| AA1060               | Adenine                                       | 2–10 mM                                 | 0.1 M HCl | 48.27–72.58 | WL at 60 °C                                 | <sup>107</sup> |
| AA1060               | Guanine                                       | 2–10 mM                                 | 0.1 M HCl | 62.28–73.50 | WL at 60 °C                                 | <sup>107</sup> |
| AA1060               | Hypoxanthine                                  | 2–10 mM                                 | 0.1 M HCl | 55.79–71.01 | WL at 60 °C                                 | <sup>107</sup> |
| AA1060               | Adenine                                       | 10 mM                                   | 0.1 M HCl | 88.87       | PDP and EIS at 30 °C                        | <sup>107</sup> |
| AA1060               | Guanine                                       | 10 mM                                   | 0.1 M HCl | 94.37       | PDP and EIS at 30 °C                        | <sup>107</sup> |
| AA1060               | Hypoxanthine                                  | 10 mM                                   | 0.1 M HCl | 91.41       | PDP and EIS at 30 °C                        | <sup>107</sup> |
| AA1060<br>(98.8% Al) | Crystal violet dye                            | $1 \cdot 10^{-3}$ mM                    | 1 M HCl   | 83.6        | WL after 2 h immersion in aerated solutions | <sup>108</sup> |
| AA1060<br>(98.8% Al) | Crystal violet dye + $1 \cdot 10^{-8}$ mM KI  | $1 \cdot 10^{-3}$ M                     | 1 M HCl   | 85.1        | WL after 2 h immersion in aerated solutions | <sup>108</sup> |
| AA1060<br>(98.8% Al) | Crystal violet dye + $1 \cdot 10^{-6}$ mM KI  | $1 \cdot 10^{-3}$ M                     | 1 M HCl   | 89.2        | WL after 2 h immersion in aerated solutions | <sup>108</sup> |
| AA1060<br>(98.8% Al) | Malachite green dye                           | $1 \cdot 10^{-2}$ mM                    | 1.0 M HCl | 42.8        | WL after 2 h immersion in aerated solutions | <sup>109</sup> |
| AA1060<br>(98.8% Al) | Malachite green dye + $1 \cdot 10^{-5}$ mM KI | $1 \cdot 10^{-2}$ mM                    | 1.0 M HCl | 89.3        | WL after 2 h immersion in aerated solutions | <sup>109</sup> |
| AA1060<br>(98.8% Al) | Malachite green dye + $1 \cdot 10^{-3}$ mM KI | $1 \cdot 10^{-2}$ mM                    | 1.0 M HCl | 77.9        | WL after 2 h immersion in aerated solutions | <sup>109</sup> |
| AA1060               | 2,3-diaminonaphthalene                        | $6 \cdot 10^{-5}$ – $1 \cdot 10^{-4}$ M | 1 M HCl   | 44.3–54.9   | HE at 30 °C                                 | <sup>110</sup> |
| AA1060               | 2,3-diaminonaphthalene                        | $6 \cdot 10^{-5}$ – $1 \cdot 10^{-4}$ M | 1 M HCl   | 27.90–39.10 | HE at 40 °C                                 | <sup>110</sup> |

|        |                                                                                          |                                           |           |             |                                         |                |
|--------|------------------------------------------------------------------------------------------|-------------------------------------------|-----------|-------------|-----------------------------------------|----------------|
| AA1060 | 2,3-diaminonaphthalene + 5 mM KI                                                         | $6 \cdot 10^{-5}$ – $1 \cdot 10^{-4}$ M   | 1 M HCl   | 55.40–67.40 | HE at 30 °C                             | <sup>110</sup> |
| AA1060 | 2,3-diaminonaphthalene + 5 mM KI                                                         | $6 \cdot 10^{-5}$ – $1 \cdot 10^{-4}$ M   | 1 M HCl   | 41.00–47.97 | HE at 40 °C                             | <sup>110</sup> |
| AA1060 | Hydroxypropyl methylcellulose                                                            | 500–2000 mg/L                             | 1 M HCl   | 5.87–85.12* | WL after 1 day of immersion at 28 °C    | <sup>112</sup> |
| AA1060 | Hydroxyethylcellulose                                                                    | $5 \cdot 10^{-4}$ – $2.5 \cdot 10^{-3}$ M | 1.0 M HCl | 27.74–57.32 | WL                                      | <sup>113</sup> |
| AA1060 | Hydroxyethylcellulose                                                                    | $5 \cdot 10^{-4}$ – $2.5 \cdot 10^{-3}$ M | 1.5 M HCl | 35.89–58.16 | WL                                      | <sup>113</sup> |
| AA1060 | Acetone oxime                                                                            | 0.2–2.0 mM                                | 1.0 M HCl | 48.8–89.2   | PDP an EIS after 2 h immersion at 20 °C | <sup>114</sup> |
| AA1060 | 2-butanone oxime                                                                         | 0.2–2.0 mM                                | 1.0 M HCl | 53.4–93.5   | PDP an EIS after 2 h immersion at 20 °C | <sup>114</sup> |
| AA1060 | Cyclohexanone oxime                                                                      | 0.2–2.0 mM                                | 1.0 M HCl | 63.7–98.4   | PDP an EIS after 2 h immersion at 20 °C | <sup>114</sup> |
| AA1060 | 5-ethyl 4-(4-methoxyphenyl)-6-methyl-2-thioxo-1,2,3,4-tetrahydropyrimidine-5-carboxylate | 100–500 ppm                               | 1 N HCl   | 47.22–93.39 | WL and PDP at 35 °C                     | <sup>115</sup> |
| AA1060 | o-phenanthroline                                                                         | 0.2–2.0 mM                                | 1 M HCl   | 33.3–98.2   | WL, PDP and EIS at 20 °C                | <sup>116</sup> |
| AA1060 | Methylene blue dye                                                                       | $10^{-5}$ – $5 \cdot 10^{-3}$ M           | 2 M HCl   | 35.14–59.46 | WL at 30°C                              | <sup>117</sup> |
| AA1060 | Methylene blue dye                                                                       | $10^{-5}$ – $5 \cdot 10^{-3}$ M           | 2 M HCl   | 12.25–40.15 | WL at 60°C                              | <sup>117</sup> |
| AA1060 | Methylene blue dye + $5 \cdot 10^{-4}$ M KI                                              | $5 \cdot 10^{-3}$ M                       | 2 M HCl   | 79.74       | WL at 30°C                              | <sup>117</sup> |
| AA1060 | Methylene blue dye + $5 \cdot 10^{-4}$ M KI                                              | $5 \cdot 10^{-3}$ M                       | 2 M HCl   | 61.23       | WL at 60°C                              | <sup>117</sup> |
| AA1060 | Methylene blue dye + $5 \cdot 10^{-4}$ M KBr                                             | $5 \cdot 10^{-3}$ M                       | 2 M HCl   | 67.57       | WL at 30°C                              | <sup>117</sup> |
| AA1060 | Methylene blue dye + $5 \cdot 10^{-4}$ M KBr                                             | $5 \cdot 10^{-3}$ M                       | 2 M HCl   | 48.31       | WL at 60°C                              | <sup>117</sup> |
| AA1060 | Methylene blue dye + $5 \cdot 10^{-4}$ M KCl                                             | $5 \cdot 10^{-3}$ M                       | 2 M HCl   | 62.16       | WL at 30°C                              | <sup>117</sup> |
| AA1060 | Methylene blue dye + $5 \cdot 10^{-4}$ M KCl                                             | $5 \cdot 10^{-3}$ M                       | 2 M HCl   | 42.87       | WL at 60°C                              | <sup>117</sup> |
| AA2024 | 1-(2H)-phtalazinone                                                                      | 0.25–1 mM                                 | 1 M HCl   | 25.0–70.0   | EIS and PDP at 30 °C                    | <sup>119</sup> |
| AA2024 | 1-(2H)-phtalazinone + 0.1% KI                                                            | 0.25–1 mM                                 | 1 M HCl   | 56.0–78.0   | EIS and PDP at 30 °C                    | <sup>119</sup> |
| AA2024 | Tryptophan                                                                               | 0.5–8.0 mM                                | 1 M HCl   | 32.91–88.37 | WL after 2 h of immersion and           | <sup>120</sup> |

|         |                                                       |             |           |             | polarisation                                    |                |
|---------|-------------------------------------------------------|-------------|-----------|-------------|-------------------------------------------------|----------------|
| AA3102  | 2-hydroxyacetophenone-etansulphonylhydrazone          | 10–50 ppm   | 0.1 M HCl | 28.0–91.0   | HE and EIS at room temperature                  | <sup>121</sup> |
| AA3102  | Salicylaldehyde-etansulphonylhydrazone                | 10–50 ppm   | 0.1 M HCl | 51.0–95.0   | HE and EIS at room temperature                  | <sup>121</sup> |
| AA3102  | 5-bromosalicylaldehyde-etansulphonylhydrazone         | 10–50 ppm   | 0.1 M HCl | 69.0–100.0  | HE and EIS at room temperature                  | <sup>121</sup> |
| AA3102  | 5-chlorosalicylaldehyde-etansulphonylaldehyde         | 10–50 ppm   | 0.1 M HCl | 57.0–94.0   | HE and EIS at room temperature                  | <sup>121</sup> |
| AA6061  | N,N'-bis(salicylidene)-1,4-diaminobutane              | 25–100 ppm  | 1 M HCl   | 65.4–75.0   | WL, PDP and EIS at 30 °C                        | <sup>122</sup> |
| AA6061  | N,N'-bis(3-methoxy salicylidene)-1,4-diaminobutane    | 25–100 ppm  | 1 M HCl   | 69.5–79.0   | WL, PDP and EIS at 30 °C                        | <sup>122</sup> |
| A-63400 | Nicotinic acid hydrazide                              | 10–250 ppm  | 1 M HCl   | 70.39–96.64 | WL after 4 h of immersion, PDP and EIS at 30 °C | <sup>123</sup> |
| AA6061  | N,N'-bis(salicylidene)-1,4-diaminophenelyne           | 100–500 ppm | 1 M HCl   | 74.0–87.0   | WL after 2 h of immersion at 30 °C              | <sup>124</sup> |
| AA6061  | N,N'-bis(salicylidene)-1,4-diaminophenelyne           | 100–500 ppm | 1 M HCl   | 56.0–78.0   | WL after 2 h of immersion at 40 °C              | <sup>124</sup> |
| AA6061  | N,N'-bis(salicylidene)-1,4-diaminophenelyne           | 100–500 ppm | 1 M HCl   | 49.0–73.0   | WL after 2 h of immersion at 50 °C              | <sup>124</sup> |
| AA6061  | N,N'-bis(salicylidene)-1,4-diaminophenelyne           | 100–500 ppm | 1 M HCl   | 45.0–69.0   | WL after 2 h of immersion at 60 °C              | <sup>124</sup> |
| AA6061  | N,N'-bis(3-methoxy salicylidene)-1,4-diaminophenelyne | 100–500 ppm | 1 M HCl   | 75.0–94.0   | WL after 2 h of immersion at 30 °C              | <sup>124</sup> |
| AA6061  | N,N'-bis(3-methoxy salicylidene)-1,4-diaminophenelyne | 100–500 ppm | 1 M HCl   | 62.0–88.0   | WL after 2 h of immersion at 40 °C              | <sup>124</sup> |
| AA6061  | N,N'-bis(3-methoxy salicylidene)-1,4-diaminophenelyne | 100–500 ppm | 1 M HCl   | 57.0–81.0   | WL after 2 h of immersion at 50 °C              | <sup>124</sup> |
| AA6061  | N,N'-bis(3-methoxy salicylidene)-1,4-diaminophenelyne | 100–500 ppm | 1 M HCl   | 52.0–75.0   | WL after 2 h of immersion at 60 °C              | <sup>124</sup> |
| AA6063  | N,N'-bis(salicylidene)-1,4-diaminophenelyne           | 100–500 ppm | 1 M HCl   | 71.0–84.0   | WL after 2 h of immersion                       | <sup>124</sup> |

|                      |                                                       |             |         |           |                                    |                |
|----------------------|-------------------------------------------------------|-------------|---------|-----------|------------------------------------|----------------|
|                      |                                                       |             |         |           | at 30 °C                           |                |
| AA6063               | N,N'-bis(salicylidene)-1,4-diaminophenelyne           | 100–500 ppm | 1 M HCl | 58.0–79.0 | WL after 2 h of immersion at 40 °C | <sup>124</sup> |
| AA6063               | N,N'-bis(salicylidene)-1,4-diaminophenelyne           | 100–500 ppm | 1 M HCl | 55.0–74.0 | WL after 2 h of immersion at 50 °C | <sup>124</sup> |
| AA6063               | N,N'-bis(salicylidene)-1,4-diaminophenelyne           | 100–500 ppm | 1 M HCl | 45.0–69.0 | WL after 2 h of immersion at 60 °C | <sup>124</sup> |
| AA6063               | N,N'-bis(3-methoxy salicylidene)-1,4-diaminophenelyne | 100–500 ppm | 1 M HCl | 72.0–86.0 | WL after 2 h of immersion at 30 °C | <sup>124</sup> |
| AA6063               | N,N'-bis(3-methoxy salicylidene)-1,4-diaminophenelyne | 100–500 ppm | 1 M HCl | 57.0–81.0 | WL after 2 h of immersion at 40 °C | <sup>124</sup> |
| AA6063               | N,N'-bis(3-methoxy salicylidene)-1,4-diaminophenelyne | 100–500 ppm | 1 M HCl | 53.0–78.0 | WL after 2 h of immersion at 50 °C | <sup>124</sup> |
| AA6063               | N,N'-bis(3-methoxy salicylidene)-1,4-diaminophenelyne | 100–500 ppm | 1 M HCl | 45.0–69.0 | WL after 2 h of immersion at 60 °C | <sup>124</sup> |
| E-195<br>(78.53% Al) | 1-buten-3-ol                                          | 0.2–20 mM   | 1 N HCl | 14–57     | PDP                                | <sup>125</sup> |
| E-195<br>(78.53% Al) | 2-methyl-3-butyn-2-ol                                 | 0.2–20 mM   | 1 N HCl | 8–67      | PDP                                | <sup>125</sup> |
| E-195<br>(78.53% Al) | 3-methyl-2-buten-1-ol                                 | 0.2–20 mM   | 1 N HCl | 17–53     | PDP                                | <sup>125</sup> |
| E-195<br>(78.53% Al) | 3-methyl-3-buten-1-ol                                 | 0.2–20 mM   | 1 N HCl | 7–33      | PDP                                | <sup>125</sup> |
| E-195<br>(78.53% Al) | 3-methyl-1-pentyn-3-ol                                | 0.2–20 mM   | 1 N HCl | 17–67     | PDP                                | <sup>125</sup> |
| E-195<br>(78.53% Al) | 5-hexen-1-ol                                          | 0.2–20 mM   | 1 N HCl | 7–33      | PDP                                | <sup>125</sup> |
| E-150<br>(83.25% Al) | 1-buten-3-ol                                          | 0.2–20 mM   | 1 N HCl | 19–21     | PDP                                | <sup>125</sup> |
| E-150<br>(83.25% Al) | 2-methyl-3-butyn-2-ol                                 | 0.2–20 mM   | 1 N HCl | 60–68     | PDP                                | <sup>125</sup> |
| E-150<br>(83.25% Al) | 3-methyl-2-buten-1-ol                                 | 0.2–20 mM   | 1 N HCl | 10–30     | PDP                                | <sup>125</sup> |

|                         |                        |           |         |       |     |     |
|-------------------------|------------------------|-----------|---------|-------|-----|-----|
| Al)                     |                        |           |         |       |     |     |
| E-150<br>(83.25%<br>Al) | 3-methyl-3-buten-1-ol  | 0.2–20 mM | 1 N HCl | 36–48 | PDP | 125 |
| E-150<br>(83.25%<br>Al) | 3-methyl-1-pentyn-3-ol | 0.2–20 mM | 1 N HCl | 50–82 | PDP | 125 |
| E-150<br>(83.25%<br>Al) | 5-hexen-1-ol           | 0.2–20 mM | 1 N HCl | 37–50 | PDP | 125 |
| E-140<br>(85.25%<br>Al) | 1-buten-3-ol           | 0.2–20 mM | 1 N HCl | 10–20 | PDP | 125 |
| E-140<br>(85.25%<br>Al) | 2-methyl-3-butyn-2-ol  | 0.2–20 mM | 1 N HCl | 30–37 | PDP | 125 |
| E-140<br>(85.25%<br>Al) | 3-methyl-2-buten-1-ol  | 0.2–20 mM | 1 N HCl | 8–25  | PDP | 125 |
| E-140<br>(85.25%<br>Al) | 3-methyl-3-buten-1-ol  | 0.2–20 mM | 1 N HCl | 17–30 | PDP | 125 |
| E-140<br>(85.25%<br>Al) | 3-methyl-1-pentyn-3-ol | 0.2–20 mM | 1 N HCl | 37–68 | PDP | 125 |
| E-140<br>(85.25%<br>Al) | 5-hexen-1-ol           | 0.2–20 mM | 1 N HCl | 11–21 | PDP | 125 |
| E-160<br>(85.70%<br>Al) | 1-buten-3-ol           | 0.2–20 mM | 1 N HCl | 33–42 | PDP | 125 |
| E-160<br>(85.70%<br>Al) | 2-methyl-3-butyn-2-ol  | 0.2–20 mM | 1 N HCl | 24–42 | PDP | 125 |
| E-160<br>(85.70%<br>Al) | 3-methyl-2-buten-1-ol  | 0.2–20 mM | 1 N HCl | 25–31 | PDP | 125 |
| E-160<br>(85.70%<br>Al) | 3-methyl-3-buten-1-ol  | 0.2–20 mM | 1 N HCl | 35–42 | PDP | 125 |
| E-160<br>(85.70%<br>Al) | 3-methyl-1-pentyn-3-ol | 0.2–20 mM | 1 N HCl | 53–65 | PDP | 125 |
| E-160<br>(85.70%<br>Al) | 5-hexen-1-ol           | 0.2–20 mM | 1 N HCl | 40–54 | PDP | 125 |
| E-171<br>(88.05%)       | 1-buten-3-ol           | 0.2–20 mM | 1 N HCl | 11–28 | PDP | 125 |

|                         |                        |           |                       |               |                              |     |
|-------------------------|------------------------|-----------|-----------------------|---------------|------------------------------|-----|
| Al)                     |                        |           |                       |               |                              |     |
| E-171<br>(88.05%<br>Al) | 2-methyl-3-butyn-2-ol  | 0.2–20 mM | 1 N HCl               | 21–82         | PDP                          | 125 |
| E-171<br>(88.05%<br>Al) | 3-methyl-2-buten-1-ol  | 0.2–20 mM | 1 N HCl               | 21–48         | PDP                          | 125 |
| E-171<br>(88.05%<br>Al) | 3-methyl-3-buten-1-ol  | 0.2–20 mM | 1 N HCl               | 28–40         | PDP                          | 125 |
| E-171<br>(88.05%<br>Al) | 3-methyl-1-pentyn-3-ol | 0.2–20 mM | 1 N HCl               | 49–76         | PDP                          | 125 |
| E-171<br>(88.05%<br>Al) | 5-hexen-1-ol           | 0.2–20 mM | 1 N HCl               | 28–60         | PDP                          | 125 |
| E-110<br>(90.21%<br>Al) | 1-buten-3-ol           | 0.2–20 mM | 1 N HCl               | 27–39         | PDP                          | 125 |
| E-110<br>(90.21%<br>Al) | 2-methyl-3-butyn-2-ol  | 0.2–20 mM | 1 N HCl               | 32–42         | PDP                          | 125 |
| E-110<br>(90.21%<br>Al) | 3-methyl-2-buten-1-ol  | 0.2–20 mM | 1 N HCl               | 20–27         | PDP                          | 125 |
| E-110<br>(90.21%<br>Al) | 3-methyl-3-buten-1-ol  | 0.2–20 mM | 1 N HCl               | 49–54         | PDP                          | 125 |
| E-110<br>(90.21%<br>Al) | 3-methyl-1-pentyn-3-ol | 0.2–20 mM | 1 N HCl               | 64–80         | PDP                          | 125 |
| E-110<br>(90.21%<br>Al) | 5-hexen-1-ol           | 0.2–20 mM | 1 N HCl               | 27–49         | PDP                          | 125 |
| Pure                    | 1-buten-3-ol           | 20 mM     | 1 N HCl               | 50            | PDP                          | 125 |
| Pure                    | 2-methyl-3-butyn-2-ol  | 20 mM     | 1 N HCl               | 75            | PDP                          | 125 |
| Pure                    | 3-methyl-2-buten-1-ol  | 20 mM     | 1 N HCl               | 52            | PDP                          | 125 |
| Pure                    | 3-methyl-3-buten-1-ol  | 20 mM     | 1 N HCl               | 68            | PDP                          | 125 |
| Pure                    | 3-methyl-1-pentyn-3-ol | 20 mM     | 1 N HCl               | 94            | PDP                          | 125 |
| Pure                    | 5-hexen-1-ol           | 20 mM     | 1 N HCl               | 60            | PDP                          | 125 |
| Al-8%Si-<br>3%Cu        | Tolyltriazole          | 2–20 mM   | 1 M HCl<br>(pH = 0.5) | 75.0–<br>97.0 | PDP and $R_p$ at<br>15–35 °C | 127 |
| Al-4%Cu                 | Tolyltriazole          | 2–20 mM   | 1 M HCl               | 42.0–         | PDP and $R_p$ at             | 127 |



|                           |                                                                                                    |                                          |                       |                 |                                                            |                |
|---------------------------|----------------------------------------------------------------------------------------------------|------------------------------------------|-----------------------|-----------------|------------------------------------------------------------|----------------|
|                           |                                                                                                    |                                          | (pH = 0.5)            | 82.0            | 15–35 °C                                                   |                |
| Al-12%Cu                  | Tolyltriazole                                                                                      | 2–20 mM                                  | 1 M HCl<br>(pH = 0.5) | 66.0–<br>87.0   | PDP and $R_p$ at<br>15–35 °C                               | <sup>127</sup> |
| Al-12%Cu-<br>4%Fe         | Tolyltriazole                                                                                      | 2–20 mM                                  | 1 M HCl<br>(pH = 0.5) | 47.0–<br>92.0   | PDP and $R_p$ at<br>15–35 °C                               | <sup>127</sup> |
| 99.89%                    | Dodecyl phenol ethoxidate                                                                          | $2 \cdot 10^{-4}$ – $10^{-2}$<br>M       | 1 M HCl               | 9.51–<br>94.76  | PDP and EIS<br>at 30 °C                                    | <sup>128</sup> |
| 93.91%<br>(Al + 6%<br>Cu) | Dodecyl phenol ethoxidate                                                                          | $2 \cdot 10^{-4}$ – $10^{-2}$<br>M       | 1 M HCl               | 11.22–<br>96.25 | PDP and EIS<br>at 30 °C                                    | <sup>128</sup> |
| 93.91%<br>(Al + 6% Si)    | Dodecyl phenol ethoxidate                                                                          | $2 \cdot 10^{-4}$ – $10^{-2}$<br>M       | 1 M HCl               | 13.75–<br>97.50 | PDP and EIS<br>at 30 °C                                    | <sup>128</sup> |
| 99.89%                    | Dodecyl phenol ethoxidate                                                                          | $2 \cdot 10^{-4}$ – $10^{-2}$<br>M       | 1 M HCl               | 49.05–<br>94.32 | EIS at 10–60<br>°C                                         | <sup>128</sup> |
| 93.91%<br>(Al + 6%<br>Cu) | Dodecyl phenol ethoxidate                                                                          | $2 \cdot 10^{-4}$ – $10^{-2}$<br>M       | 1 M HCl               | 60.00–<br>96.14 | EIS at 10–60<br>°C                                         | <sup>128</sup> |
| 93.91%<br>(Al + 6% Si)    | Dodecyl phenol ethoxidate                                                                          | $2 \cdot 10^{-4}$ – $10^{-2}$<br>M       | 1 M HCl               | 64.82–<br>97.02 | EIS at 10–60<br>°C                                         | <sup>128</sup> |
| 94.85%<br>(Al–3Mg)        | 4-(methoxymethyl)-1,6-dimethyl-2-oxo-1,2-dihydropyridine-3-carbonitrile                            | $1 \cdot 10^{-6}$ – $1 \cdot 10^{-3}$ M  | 0.5 M HCl             | 53.0–<br>96.8   | WL after 3 h<br>of immersion,<br>PDP and $R_p$ at<br>25 °C | <sup>129</sup> |
| 94.85%<br>(Al–3Mg)        | 4-amino-3,5-bis[6-(methoxymethyl)-3,4-dimethyl-2-oxo-1,2 dihydropyridine-1-yl]-1,2,4-triazole-2(H) | $1 \cdot 10^{-6}$ – $1 \cdot 10^{-3}$ M  | 0.5 M HCl             | 59.1–<br>97.8   | WL after 3 h<br>of immersion,<br>PDP and $R_p$ at<br>25 °C | <sup>129</sup> |
| 94.85%<br>(Al–3Mg)        | 4-(methoxymethyl)-1,6-dimethyl-2-oxo-1,2-dihydropyridine-3-carbonitrile                            | $1 \cdot 10^{-6}$ – $1 \cdot 10^{-3}$ M  | 1.0 M HCl             | 48.0–<br>97.2   | WL after 3 h<br>of immersion,<br>PDP and $R_p$ at<br>25 °C | <sup>129</sup> |
| 94.85%<br>(Al–3Mg)        | 4-amino-3,5-bis[6-(methoxymethyl)-3,4-dimethyl-2-oxo-1,2 dihydropyridine-1-yl]-1,2,4-triazole-2(H) | $1 \cdot 10^{-6}$ – $1 \cdot 10^{-3}$ M  | 1.0 M HCl             | 83.0–<br>96.5   | WL after 3 h<br>of immersion,<br>PDP and $R_p$ at<br>25 °C | <sup>129</sup> |
| 99.89%                    | Dodecyl benzene sulphonate                                                                         | $2 \cdot 10^{-4}$ – $10 \cdot 10^{-3}$ M | 1 M HCl               | 5.40–<br>93.00  | WL after 3 h<br>of immersion,<br>PDP and $R_p$ at<br>25 °C | <sup>130</sup> |
| Al +6% Cu                 | Dodecyl benzene sulphonate                                                                         | $2 \cdot 10^{-4}$ – $10 \cdot 10^{-3}$ M | 1 M HCl               | 8.26–<br>94.24  | WL, PDP and<br>EIS at 30 °C                                | <sup>130</sup> |
| Al + 6% Si                | Dodecyl benzene sulphonate                                                                         | $2 \cdot 10^{-4}$ – $10 \cdot 10^{-3}$ M | 1 M HCl               | 11.00–<br>95.75 | WL, PDP and<br>EIS at 30 °C                                | <sup>130</sup> |

|                           |                                                    |                                         |           |             |                             |                |
|---------------------------|----------------------------------------------------|-----------------------------------------|-----------|-------------|-----------------------------|----------------|
| 99.89%                    | Dodecyl benzene sulphonate                         | $2 \cdot 10^{-3}$ M                     | 1 M HCl   | 39.04–91.24 | WL, PDP and EIS at 10–60 °C | <sup>130</sup> |
| Al +6% Cu                 | Dodecyl benzene sulphonate                         | $2 \cdot 10^{-3}$ M                     | 1 M HCl   | 42.52–94.00 | WL, PDP and EIS at 10–60 °C | <sup>130</sup> |
| Al + 6% Si                | Dodecyl benzene sulphonate                         | $2 \cdot 10^{-3}$ M                     | 1 M HCl   | 49.48–95.18 | WL, PDP and EIS at 10–60 °C | <sup>130</sup> |
| Al (89.165%) + 10.502% Si | 4-amino-1,5-dimethyl-2-phenyl-1H-pyrazol-3(2H)-one | $1 \cdot 10^{-6}$ – $5 \cdot 10^{-4}$ M | 1 M HCl   | 7.09–82.8   | PDP at 25 °C                | <sup>131</sup> |
| Al (89.165%) + 10.502% Si | 1,5-dimethyl-2-phenyl-1Hpyrazol-3(2H)-one          | $1 \cdot 10^{-6}$ – $5 \cdot 10^{-4}$ M | 1 M HCl   | 20.5–90.3   | PDP at 25 °C                | <sup>131</sup> |
| Al (89.165%) + 10.502% Si | 4-amino-1,5-dimethyl-2-phenyl-1H-pyrazol-3(2H)-one | $1 \cdot 10^{-5}$ – $5 \cdot 10^{-4}$ M | 1 M HCl   | 25.3–68.9   | EIS at 25 °C                | <sup>131</sup> |
| Al (89.165%) + 10.502% Si | 1,5-dimethyl-2-phenyl-1Hpyrazol-3(2H)-one          | $1 \cdot 10^{-5}$ – $5 \cdot 10^{-4}$ M | 1 M HCl   | 15.8–64.9   | EIS at 25 °C                | <sup>131</sup> |
| NG                        | 5-benzylidene-1-methyl-2-methylthioimidazole-4-one | $1 \cdot 10^{-6}$ – $5 \cdot 10^{-4}$ M | 0.5 M HCl | 49.1–82.5   | WL, HE and $R_p$ at 30 °C   | <sup>132</sup> |
| NG                        | 5-benzylidene-1-methyl-2-methylthioimidazole-4-one | $1 \cdot 10^{-6}$ M                     | 0.5 M HCl | 50.0–60.0   | WL at 30–60 °C              | <sup>132</sup> |
| NG                        | Diphenylthiocarbazone                              | $1 \cdot 10^{-6}$ – $1 \cdot 10^{-2}$ M | 0.5 M HCl | 32.50–82.02 | WL at 30 °C                 | <sup>133</sup> |
| NG                        | Diphenyl carbazone                                 | $1 \cdot 10^{-6}$ – $1 \cdot 10^{-2}$ M | 0.5 M HCl | 15.60–56.40 | WL at 30 °C                 | <sup>133</sup> |
| NG                        | 1-phenyl-1H-tetrazole-5-thiol                      | $10^{-4}$ – $10^{-2}$ M                 | 1 M HCl   | 58.21–99.11 | WL, PDP and EIS at 25 °C    | <sup>134</sup> |
| NG                        | 1-phenyl-1H-tetrazole                              | $10^{-4}$ – $10^{-2}$ M                 | 1 M HCl   | 55.72–97.12 | WL, PDP and EIS at 25 °C    | <sup>134</sup> |
| NG                        | 1H-tetrazol-5-amine                                | $10^{-4}$ – $10^{-2}$ M                 | 1 M HCl   | 43.62–94.92 | WL, PDP and EIS at 25 °C    | <sup>134</sup> |
| NG                        | 1H-tetrazole                                       | $10^{-4}$ – $10^{-2}$ M                 | 1 M HCl   | 30.73–94.03 | WL, PDP and EIS at 25 °C    | <sup>134</sup> |

|                       |                                            |                                       |                                      |               |                                 |                |
|-----------------------|--------------------------------------------|---------------------------------------|--------------------------------------|---------------|---------------------------------|----------------|
| NG                    | Polyvinyl pyrrolidone                      | $2 \cdot 10^{-5} - 1 \cdot 10^{-4}$ M | 2 M HCl                              | 36.0–58.0     | HE at 30 °C                     | <sup>135</sup> |
| NG                    | Polyvinyl pyrrolidone                      | $2 \cdot 10^{-5} - 1 \cdot 10^{-4}$ M | 2 M HCl                              | 33.0–54.0     | HE at 40 °C                     | <sup>135</sup> |
| NG                    | Polyvinyl pyrrolidone                      | $2 \cdot 10^{-5} - 1 \cdot 10^{-4}$ M | 2 M HCl                              | 20.0–50.0     | HE at 50 °C                     | <sup>135</sup> |
| NG                    | Polyvinyl pyrrolidone                      | $2 \cdot 10^{-5} - 1 \cdot 10^{-4}$ M | 2 M HCl                              | 19.0–43.0     | HE at 60 °C                     | <sup>135</sup> |
| NG                    | Polyvinyl pyrrolidone + 6 mM KI            | $2 \cdot 10^{-5} - 1 \cdot 10^{-4}$ M | 2 M HCl                              | 47.0–71.0     | HE at 30 °C                     | <sup>135</sup> |
| NG                    | Polyvinyl pyrrolidone + 6 mM KI            | $2 \cdot 10^{-5} - 1 \cdot 10^{-4}$ M | 2 M HCl                              | 41.0–61.0     | HE at 40 °C                     | <sup>135</sup> |
| NG                    | Polyvinyl pyrrolidone + 6 mM KI            | $2 \cdot 10^{-5} - 1 \cdot 10^{-4}$ M | 2 M HCl                              | 28.0–58.0     | HE at 50 °C                     | <sup>135</sup> |
| NG                    | Polyvinyl pyrrolidone + 6 mM KI            | $2 \cdot 10^{-5} - 1 \cdot 10^{-4}$ M | 2 M HCl                              | 25.0–55.0     | HE at 60 °C                     | <sup>135</sup> |
| Cold rolled aluminium | 2-nonyl-1,3-imidazoline                    | 500 ppm                               | 1 M HCl                              | 97.63         | PDP at 30 °C                    | <sup>136</sup> |
| Cold rolled aluminium | 2-undecyl-1,3-imidazoline                  | 500 ppm                               | 1 M HCl                              | 98.02         | PDP at 30 °C                    | <sup>136</sup> |
| Cold rolled aluminium | 2-pentadecyl-1,3-imidazoline               | 500 ppm                               | 1 M HCl                              | 93.91         | PDP at 30 °C                    | <sup>136</sup> |
| Cold rolled aluminium | 2-heptadecyl-1,3-imidazoline               | 500 ppm                               | 1 M HCl                              | 93.25         | PDP at 30 °C                    | <sup>136</sup> |
| Cold rolled aluminium | 2-undecyl-1,3-imidazoline                  | 25–500 ppm                            | 1 M HCl                              | 70.19–93.43   | EIS at 30 °C                    | <sup>136</sup> |
| 99.99%                | Polyacrylic acid                           | $1 \cdot 10^{-5} - 1 \cdot 10^{-3}$ M | 0.5 M H <sub>2</sub> SO <sub>4</sub> | 19.0–58.0     | EIS and PDP at 30 °C            | <sup>137</sup> |
| 99.99%                | Polyacrylic acid + 0.5–5.0 mM KI           | $1 \cdot 10^{-3}$ M                   | 0.5 M H <sub>2</sub> SO <sub>4</sub> | 39.0–87.0     | EIS and PDP at 30 °C            | <sup>137</sup> |
| 99.89%                | Polyoxyethylene 20 mono oleate             | 0.1–1 mM                              | 1 M H <sub>2</sub> SO <sub>4</sub>   | 12.029–40.201 | WL and PDP at 25 °C             | <sup>65</sup>  |
| 99.89%                | Polyoxyethylene 40 mono oleate             | 0.1–1 mM                              | 1 M H <sub>2</sub> SO <sub>4</sub>   | 23.991–24.307 | WL and PDP at 25 °C             | <sup>65</sup>  |
| 99.89%                | Polyoxyethylene 80 mono oleate             | 0.1–1 mM                              | 1 M H <sub>2</sub> SO <sub>4</sub>   | 39.999–61.307 | WL and PDP at 25 °C             | <sup>65</sup>  |
| 99.3%                 | Propargyl alcohol                          | 1.25–10 mM                            | 0.5 M H <sub>2</sub> SO <sub>4</sub> | 33.1–70.7     | EIS and PDP at room temperature | <sup>139</sup> |
| 99.3%                 | Propargyl alcohol + 0.01% Zn <sup>2+</sup> | 1.25–10 mM                            | 0.5 M H <sub>2</sub> SO <sub>4</sub> | 59.2–81.3     | EIS and PDP at room temperature | <sup>139</sup> |

|                 |                                                                                               |                                              |                                          |              |                                 |                |
|-----------------|-----------------------------------------------------------------------------------------------|----------------------------------------------|------------------------------------------|--------------|---------------------------------|----------------|
| 98.99%          | Zinc gluconate                                                                                | 0.5–2.0 w/v %                                | 0.5 M H <sub>2</sub> SO <sub>4</sub>     | 61.48–99.99* | PDP and R <sub>p</sub> at 28 °C | <sup>140</sup> |
| 98.5%           | N-(4-N, N-dimethylaminobenzal)- <i>p</i> -anisidine                                           | 0.1–0.7 wt.%                                 | 0.1–0.5 N H <sub>2</sub> SO <sub>4</sub> | 59.45–77.74  | WL after 168 h immersion        | <sup>141</sup> |
| 98.5%           | N-(4-N, N-dimethylaminobenzal)- <i>p</i> -toluidine                                           | 0.1–0.7 wt.%                                 | 0.1–0.5 N H <sub>2</sub> SO <sub>4</sub> | 51.55–72.76  | WL after 168 h immersion        | <sup>141</sup> |
| 98.5%           | N-(4-N, N-dimethylaminobenzal)-2,4-dinitroaniline                                             | 0.1–0.7 wt.%                                 | 0.1–0.5 N H <sub>2</sub> SO <sub>4</sub> | 45.01–67.77  | WL after 168 h immersion        | <sup>141</sup> |
| 98.5%           | N-(4-N, N-dimethylaminobenzal)- <i>p</i> -anisidine + 2 N Na <sub>2</sub> SO <sub>4</sub>     | 0.1–0.7 wt.%                                 | 1.0–2.0 N H <sub>2</sub> SO <sub>4</sub> | 64.33–90.20  | WL after 120 h immersion        | <sup>141</sup> |
| 98.5%           | N-(4-N, N-dimethylaminobenzal)- <i>p</i> -toluidine + 2 N Na <sub>2</sub> SO <sub>4</sub>     | 0.1–0.7 wt.%                                 | 1.0–2.0 N H <sub>2</sub> SO <sub>4</sub> | 60.32–86.38  | WL after 120 h immersion        | <sup>141</sup> |
| 98.5%           | N-(4-N, N-dimethylaminobenzal)-2,4-dinitroaniline + 2 N Na <sub>2</sub> SO <sub>4</sub>       | 0.1–0.7 wt.%                                 | 1.0–2.0 N H <sub>2</sub> SO <sub>4</sub> | 53.37–80.56  | WL after 120 h immersion        | <sup>141</sup> |
| 3SR (98.5076%)  | 2-[(3-nitrobenzylidene) amino]                                                                | 1 · 10 <sup>-2</sup> M                       | 2 M H <sub>2</sub> SO <sub>4</sub>       | 63.81        | WL and HE at 30 °C              | <sup>142</sup> |
| 94.44%          | 1-methyl-4-[4'(-H)-styryl] pyridinium iodide                                                  | 10 <sup>-4</sup> M                           | 0.5 M H <sub>2</sub> SO <sub>4</sub>     | 19.44        | WL at 30 °C                     | <sup>143</sup> |
| 94.44%          | 1-methyl-4-[4'(-Cl)-styryl] pyridinium iodide                                                 | 10 <sup>-4</sup> M                           | 0.5 M H <sub>2</sub> SO <sub>4</sub>     | 6.94         | WL at 30 °C                     | <sup>143</sup> |
| 94.44%          | 1-methyl-4-[4'(-H)-styryl] pyridinium iodide                                                  | 10 <sup>-4</sup> M                           | 0.5 M H <sub>2</sub> SO <sub>4</sub>     | 38.80        | WL at 30 °C                     | <sup>143</sup> |
| AA1005          | 3,3'-(1,4-phenylene)bis(2-imino-2,3-dihydrobenzo[d]oxazole-5,3-yl)bis(4-thylbenzenesulfonate) | 0.001–0.01 M                                 | 0.5 M H <sub>2</sub> SO <sub>4</sub>     | 8.10–61.43   | Tafel extrapolation at 25 °C    | <sup>144</sup> |
| AA1005          | 3,3'-(1,4-phenylene)bis(2-imino-2,3-dihydrobenzo[d]oxazole-5,3-yl)bis(4-thylbenzenesulfonate) | 2 · 10 <sup>-4</sup> –1 · 10 <sup>-3</sup> M | 0.5 M H <sub>2</sub> SO <sub>4</sub>     | 17.80–65.06  | WL and EIS at 25 °C             | <sup>144</sup> |
| AA1005          | 3,3'-(1,4-phenylene)bis(2-imino-2,3-dihydrobenzo[d]oxazole-5,3-yl)bis(4-thylbenzenesulfonate) | 2 · 10 <sup>-4</sup> –1 · 10 <sup>-3</sup> M | 0.5 M H <sub>2</sub> SO <sub>4</sub>     | 28.09–64.71  | WL at 35 °C                     | <sup>144</sup> |
| AA1005          | 3,3'-(1,4-phenylene)bis(2-imino-2,3-dihydrobenzo[d]oxazole-5,3-yl)bis(4-thylbenzenesulfonate) | 2 · 10 <sup>-4</sup> –1 · 10 <sup>-3</sup> M | 0.5 M H <sub>2</sub> SO <sub>4</sub>     | 24.36–68.32  | WL at 45 °C                     | <sup>144</sup> |
| AA 1060 (98.5%) | 2-acetylphenothiazine                                                                         | 0.5 M                                        | 0.5 M H <sub>2</sub> SO <sub>4</sub>     | 65.55–77.18  | WL and Thermometric at 30–60 °C | <sup>146</sup> |
| AA 1060 (98.5%) | 2-acetylphenothiazine + 0.05 M KI                                                             | 0.5 M                                        | 0.5 M H <sub>2</sub> SO <sub>4</sub>     | 94.44–96.23  | WL and Thermometric at 30–60 °C | <sup>146</sup> |
| AA 1060 (98.5%) | 2-acetylphenothiazine + 0.05 M KBr                                                            | 0.5 M                                        | 0.5 M H <sub>2</sub> SO <sub>4</sub>     | 88.33–92.47  | WL and Thermometric at 30–60 °C | <sup>146</sup> |
| AA 1060 (98.5%) | 2-acetylphenothiazine + 0.05 M KCl                                                            | 0.5 M                                        | 0.5 M H <sub>2</sub> SO <sub>4</sub>     | 78.88–92.47  | WL and Thermometric at 30–60 °C | <sup>146</sup> |
| AA1060          | Hydroxypropyl methylcellulose                                                                 | 500–2000 mg/L                                | 0.5 M H <sub>2</sub> SO <sub>4</sub>     | 28.57–60.44* | WL after 5 days                 | <sup>147</sup> |

|        |                                                                                                                                      |               |                                      |              |                                      |                |
|--------|--------------------------------------------------------------------------------------------------------------------------------------|---------------|--------------------------------------|--------------|--------------------------------------|----------------|
|        |                                                                                                                                      |               |                                      |              | immersion                            |                |
| AA1060 | Hydroxypropyl methylcellulose + 500 mg/L KI                                                                                          | 2000 mg/L     | 0.5 M H <sub>2</sub> SO <sub>4</sub> | 54.67*       | EIS at 29 °C                         | <sup>147</sup> |
| AA1060 | Hydroxyethyl cellulose                                                                                                               | 500–2000 mg/L | 0.5 M H <sub>2</sub> SO <sub>4</sub> | 35.82–84.18  | WL after 5 days immersion and EIS    | <sup>148</sup> |
| AA1060 | Hydroxyethyl cellulose + 500 mg/L KI                                                                                                 | 2000 mg/L     | 0.5 M H <sub>2</sub> SO <sub>4</sub> | 25.43        | EIS                                  | <sup>148</sup> |
| AA1060 | Poly(methacrylic acid) (PMAA)                                                                                                        | 50–1000 ppm   | 0.5 M H <sub>2</sub> SO <sub>4</sub> | 8.2–48.7     | PDP and EIS at 25 °C                 | <sup>149</sup> |
| AA1060 | Poly(methacrylic acid) + 2.5 mM KI                                                                                                   | 1000 ppm      | 0.5 M H <sub>2</sub> SO <sub>4</sub> | 64.7         | PDP and EIS at 25 °C                 | <sup>149</sup> |
| AA1060 | Poly(methacrylic acid) + 5.0 mM KI                                                                                                   | 1000 ppm      | 0.5 M H <sub>2</sub> SO <sub>4</sub> | 82.6         | PDP and EIS at 25 °C                 | <sup>149</sup> |
| AA1060 | Hydroxypropyl methylcellulose                                                                                                        | 500–2000 mg/L | 0.5 M H <sub>2</sub> SO <sub>4</sub> | 19.05–57.14* | WL after 1 day of immersion at 28 °C | <sup>112</sup> |
| AA2024 | N,N'-((2E,2'E)-2,2'-(1,4-phenylenebis(methanylylidene))bis(hydrazinecarbonothioyl))bis(2-oxo-2H-chromene-3-carboxamide)              | 0.10–0.50 mM  | 1 M H <sub>2</sub> SO <sub>4</sub>   | 67.0–74.9    | PDP and EIS at 30 °C                 | <sup>150</sup> |
| AA2024 | N,N'-((2E,2'E)-2,2'-(1,4-phenylenebis(methanylylidene))bis(hydrazinecarbonothioyl))bis(2-oxo-2H-chromene-3-carboxamide) + 6.02 mM KI | 0.10–0.50 mM  | 1 M H <sub>2</sub> SO <sub>4</sub>   | 79.3–87.0    | PDP and EIS at 30 °C                 | <sup>150</sup> |
| AA6061 | Poly(1-vinyl-3-dodecylimidazolium hexafluorophosphate)                                                                               | 10–100 ppm    | 0.1 M H <sub>2</sub> SO <sub>4</sub> | 37.0–61.0    | R <sub>p</sub> at 25 °C              | <sup>151</sup> |
| AA6061 | Poly(1-vinyl-3-octylimidazolium hexafluorophosphate)                                                                                 | 10–100 ppm    | 0.1 M H <sub>2</sub> SO <sub>4</sub> | 28.0–53.0    | R <sub>p</sub> at 25 °C              | <sup>151</sup> |
| AA6061 | Poly(1-vinyl-3-butylimidazolium hexafluorophosphate)                                                                                 | 10–100 ppm    | 0.1 M H <sub>2</sub> SO <sub>4</sub> | 25.0–50.0    | R <sub>p</sub> at 25 °C              | <sup>151</sup> |
| AA6061 | Poly(1-vinyl-3-dodecylimidazolium hexafluorophosphate)                                                                               | 10–100 ppm    | 0.3 M H <sub>2</sub> SO <sub>4</sub> | 28.0–53.0    | R <sub>p</sub> at 25 °C              | <sup>151</sup> |
| AA6061 | Poly(1-vinyl-3-octylimidazolium hexafluorophosphate)                                                                                 | 10–100 ppm    | 0.3 M H <sub>2</sub> SO <sub>4</sub> | 24.0–39.0    | R <sub>p</sub> at 25 °C              | <sup>151</sup> |
| AA6061 | Poly(1-vinyl-3-butylimidazolium hexafluorophosphate)                                                                                 | 10–100 ppm    | 0.3 M H <sub>2</sub> SO <sub>4</sub> | 24.0–38.0    | R <sub>p</sub> at 25 °C              | <sup>151</sup> |
| AA6061 | Poly(1-vinyl-3-dodecylimidazolium hexafluorophosphate)                                                                               | 10–100 ppm    | 0.7 M H <sub>2</sub> SO <sub>4</sub> | 27.0–44.0    | R <sub>p</sub> at 25 °C              | <sup>151</sup> |
| AA6061 | Poly(1-vinyl-3-octylimidazolium hexafluorophosphate)                                                                                 | 10–100 ppm    | 0.7 M H <sub>2</sub> SO <sub>4</sub> | 24.0–39.0    | R <sub>p</sub> at 25 °C              | <sup>151</sup> |

|        |                                                        |            |                                      |           |                                                  |                |
|--------|--------------------------------------------------------|------------|--------------------------------------|-----------|--------------------------------------------------|----------------|
|        | hexafluorophosphate)                                   |            |                                      |           |                                                  |                |
| AA6061 | Poly(1-vinyl-3-butylimidazolium hexafluorophosphate)   | 10–100 ppm | 0.7 M H <sub>2</sub> SO <sub>4</sub> | 24.0–38.0 | R <sub>p</sub> at 25 °C                          | <sup>151</sup> |
| AA6061 | Poly(1-vinyl-3-dodecylimidazolium hexafluorophosphate) | 10–100 ppm | 1.0 M H <sub>2</sub> SO <sub>4</sub> | 5.0–25.0  | R <sub>p</sub> at 25 °C                          | <sup>151</sup> |
| AA6061 | Poly(1-vinyl-3-octylimidazolium hexafluorophosphate)   | 10–100 ppm | 1.0 M H <sub>2</sub> SO <sub>4</sub> | 1.0–21.0  | R <sub>p</sub> at 25 °C                          | <sup>151</sup> |
| AA6061 | Poly(1-vinyl-3-butylimidazolium hexafluorophosphate)   | 10–100 ppm | 1.0 M H <sub>2</sub> SO <sub>4</sub> | 1.0–19.0  | R <sub>p</sub> at 25 °C                          | <sup>151</sup> |
| AA6061 | Poly(1-vinyl-3-dodecylimidazolium hexafluorophosphate) | 10 ppm     | 1.0 M H <sub>2</sub> SO <sub>4</sub> | 18.0–24.0 | R <sub>p</sub> after 1–9 h of immersion at 25 °C | <sup>151</sup> |
| AA6061 | Poly(1-vinyl-3-octylimidazolium hexafluorophosphate)   | 10 ppm     | 1.0 M H <sub>2</sub> SO <sub>4</sub> | 15.0–20.0 | R <sub>p</sub> after 1–9 h of immersion at 25 °C | <sup>151</sup> |
| AA6061 | Poly(1-vinyl-3-butylimidazolium hexafluorophosphate)   | 10 ppm     | 1.0 M H <sub>2</sub> SO <sub>4</sub> | 12.0–15.0 | R <sub>p</sub> after 1–9 h of immersion at 25 °C | <sup>151</sup> |
| AA6061 | Poly(1-vinyl-3-dodecylimidazolium hexafluorophosphate) | 30 ppm     | 1.0 M H <sub>2</sub> SO <sub>4</sub> | 23.0–30.0 | R <sub>p</sub> after 1–9 h of immersion at 25 °C | <sup>151</sup> |
| AA6061 | Poly(1-vinyl-3-octylimidazolium hexafluorophosphate)   | 30 ppm     | 1.0 M H <sub>2</sub> SO <sub>4</sub> | 20.0–26.0 | R <sub>p</sub> after 1–9 h of immersion at 25 °C | <sup>151</sup> |
| AA6061 | Poly(1-vinyl-3-butylimidazolium hexafluorophosphate)   | 30 ppm     | 1.0 M H <sub>2</sub> SO <sub>4</sub> | 15.0–20.0 | R <sub>p</sub> after 1–9 h of immersion at 25 °C | <sup>151</sup> |
| AA6061 | Poly(1-vinyl-3-dodecylimidazolium hexafluorophosphate) | 75 ppm     | 1.0 M H <sub>2</sub> SO <sub>4</sub> | 36.0–40.0 | R <sub>p</sub> after 1–9 h of immersion at 25 °C | <sup>151</sup> |
| AA6061 | Poly(1-vinyl-3-octylimidazolium hexafluorophosphate)   | 75 ppm     | 1.0 M H <sub>2</sub> SO <sub>4</sub> | 29.0–38.0 | R <sub>p</sub> after 1–9 h of immersion at 25 °C | <sup>151</sup> |
| AA6061 | Poly(1-vinyl-3-butylimidazolium hexafluorophosphate)   | 75 ppm     | 1.0 M H <sub>2</sub> SO <sub>4</sub> | 25.0–30.0 | R <sub>p</sub> after 1–9 h of immersion at 25 °C | <sup>151</sup> |
| AA6061 | Poly(1-vinyl-3-dodecylimidazolium hexafluorophosphate) | 10–100 ppm | 1.0 M H <sub>2</sub> SO <sub>4</sub> | 55.0–66.0 | R <sub>p</sub> after 1–9 h of immersion at 25 °C | <sup>151</sup> |
| AA6061 | Poly(1-vinyl-3-octylimidazolium hexafluorophosphate)   | 10–100 ppm | 1.0 M H <sub>2</sub> SO <sub>4</sub> | 47.0–61.0 | R <sub>p</sub> after 1–9 h of immersion at 25 °C | <sup>151</sup> |
| AA6061 | Poly(1-vinyl-3-butylimidazolium hexafluorophosphate)   | 10–100 ppm | 1.0 M H <sub>2</sub> SO <sub>4</sub> | 39.0–44.0 | R <sub>p</sub> after 1–9 h of immersion at 25 °C | <sup>151</sup> |

|                         |                        |           |                                    |       |     |                |
|-------------------------|------------------------|-----------|------------------------------------|-------|-----|----------------|
| E-195<br>(78.53%<br>Al) | 1-buten-3-ol           | 0.2–20 mM | 1 N H <sub>2</sub> SO <sub>4</sub> | 94–98 | PDP | <sup>126</sup> |
| E-195<br>(78.53%<br>Al) | 2-methyl-3-butyn-2-ol  | 0.2–20 mM | 1 N H <sub>2</sub> SO <sub>4</sub> | 82–96 | PDP | <sup>126</sup> |
| E-195<br>(78.53%<br>Al) | 3-methyl-2-buten-1-ol  | 0.2–20 mM | 1 N H <sub>2</sub> SO <sub>4</sub> | 89–97 | PDP | <sup>126</sup> |
| E-195<br>(78.53%<br>Al) | 3-methyl-3-buten-1-ol  | 0.2–20 mM | 1 N H <sub>2</sub> SO <sub>4</sub> | 93–97 | PDP | <sup>126</sup> |
| E-195<br>(78.53%<br>Al) | 3-methyl-1-pentyn-3-ol | 0.2–20 mM | 1 N H <sub>2</sub> SO <sub>4</sub> | 89–98 | PDP | <sup>126</sup> |
| E-195<br>(78.53%<br>Al) | 5-hexen-1-ol           | 0.2–20 mM | 1 N H <sub>2</sub> SO <sub>4</sub> | 82–96 | PDP | <sup>126</sup> |
| E-150<br>(83.25%<br>Al) | 1-buten-3-ol           | 0.2–20 mM | 1 N H <sub>2</sub> SO <sub>4</sub> | 68–99 | PDP | <sup>126</sup> |
| E-150<br>(83.25%<br>Al) | 2-methyl-3-butyn-2-ol  | 0.2–20 mM | 1 N H <sub>2</sub> SO <sub>4</sub> | 80–95 | PDP | <sup>126</sup> |
| E-150<br>(83.25%<br>Al) | 3-methyl-2-buten-1-ol  | 0.2–20 mM | 1 N H <sub>2</sub> SO <sub>4</sub> | 84–97 | PDP | <sup>126</sup> |
| E-150<br>(83.25%<br>Al) | 3-methyl-3-buten-1-ol  | 0.2–20 mM | 1 N H <sub>2</sub> SO <sub>4</sub> | 62–80 | PDP | <sup>126</sup> |
| E-150<br>(83.25%<br>Al) | 3-methyl-1-pentyn-3-ol | 0.2–20 mM | 1 N H <sub>2</sub> SO <sub>4</sub> | 60–92 | PDP | <sup>126</sup> |
| E-150<br>(83.25%<br>Al) | 5-hexen-1-ol           | 0.2–20 mM | 1 N H <sub>2</sub> SO <sub>4</sub> | 75–98 | PDP | <sup>126</sup> |
| E-140<br>(85.25%<br>Al) | 1-buten-3-ol           | 0.2–20 mM | 1 N H <sub>2</sub> SO <sub>4</sub> | 60–90 | PDP | <sup>126</sup> |
| E-140<br>(85.25%<br>Al) | 2-methyl-3-butyn-2-ol  | 0.2–20 mM | 1 N H <sub>2</sub> SO <sub>4</sub> | 75–96 | PDP | <sup>126</sup> |
| E-140<br>(85.25%<br>Al) | 3-methyl-2-buten-1-ol  | 0.2–20 mM | 1 N H <sub>2</sub> SO <sub>4</sub> | 20–75 | PDP | <sup>126</sup> |
| E-140<br>(85.25%<br>Al) | 3-methyl-3-buten-1-ol  | 0.2–20 mM | 1 N H <sub>2</sub> SO <sub>4</sub> | 60–92 | PDP | <sup>126</sup> |

|                         |                        |           |                                    |       |     |                |
|-------------------------|------------------------|-----------|------------------------------------|-------|-----|----------------|
| E-140<br>(85.25%<br>Al) | 3-methyl-1-pentyn-3-ol | 0.2–20 mM | 1 N H <sub>2</sub> SO <sub>4</sub> | 75–94 | PDP | <sup>126</sup> |
| E-140<br>(85.25%<br>Al) | 5-hexen-1-ol           | 0.2–20 mM | 1 N H <sub>2</sub> SO <sub>4</sub> | 60–92 | PDP | <sup>126</sup> |
| E-160<br>(85.70%<br>Al) | 1-buten-3-ol           | 0.2–20 mM | 1 N H <sub>2</sub> SO <sub>4</sub> | 75–96 | PDP | <sup>126</sup> |
| E-160<br>(85.70%<br>Al) | 2-methyl-3-butyn-2-ol  | 0.2–20 mM | 1 N H <sub>2</sub> SO <sub>4</sub> | 20–60 | PDP | <sup>126</sup> |
| E-160<br>(85.70%<br>Al) | 3-methyl-2-buten-1-ol  | 0.2–20 mM | 1 N H <sub>2</sub> SO <sub>4</sub> | 75–95 | PDP | <sup>126</sup> |
| E-160<br>(85.70%<br>Al) | 3-methyl-3-buten-1-ol  | 0.2–20 mM | 1 N H <sub>2</sub> SO <sub>4</sub> | 37–80 | PDP | <sup>126</sup> |
| E-160<br>(85.70%<br>Al) | 3-methyl-1-pentyn-3-ol | 0.2–20 mM | 1 N H <sub>2</sub> SO <sub>4</sub> | 37–96 | PDP | <sup>126</sup> |
| E-160<br>(85.70%<br>Al) | 5-hexen-1-ol           | 0.2–20 mM | 1 N H <sub>2</sub> SO <sub>4</sub> | 75–94 | PDP | <sup>126</sup> |
| E-171<br>(88.05%<br>Al) | 1-buten-3-ol           | 0.2–20 mM | 1 N H <sub>2</sub> SO <sub>4</sub> | 84–95 | PDP | <sup>126</sup> |
| E-171<br>(88.05%<br>Al) | 2-methyl-3-butyn-2-ol  | 0.2–20 mM | 1 N H <sub>2</sub> SO <sub>4</sub> | 69–98 | PDP | <sup>126</sup> |
| E-171<br>(88.05%<br>Al) | 3-methyl-2-buten-1-ol  | 0.2–20 mM | 1 N H <sub>2</sub> SO <sub>4</sub> | 61–95 | PDP | <sup>126</sup> |
| E-171<br>(88.05%<br>Al) | 3-methyl-3-buten-1-ol  | 0.2–20 mM | 1 N H <sub>2</sub> SO <sub>4</sub> | 69–95 | PDP | <sup>126</sup> |
| E-171<br>(88.05%<br>Al) | 3-methyl-1-pentyn-3-ol | 0.2–20 mM | 1 N H <sub>2</sub> SO <sub>4</sub> | 69–94 | PDP | <sup>126</sup> |
| E-171<br>(88.05%<br>Al) | 5-hexen-1-ol           | 0.2–20 mM | 1 N H <sub>2</sub> SO <sub>4</sub> | 80–95 | PDP | <sup>126</sup> |
| E-110<br>(90.21%<br>Al) | 1-buten-3-ol           | 0.2–20 mM | 1 N H <sub>2</sub> SO <sub>4</sub> | 90–95 | PDP | <sup>126</sup> |
| E-110<br>(90.21%<br>Al) | 2-methyl-3-butyn-2-ol  | 0.2–20 mM | 1 N H <sub>2</sub> SO <sub>4</sub> | 40–87 | PDP | <sup>126</sup> |



|                         |                                  |                                         |                                      |                 |                                                            |                |
|-------------------------|----------------------------------|-----------------------------------------|--------------------------------------|-----------------|------------------------------------------------------------|----------------|
| E-110<br>(90.21%<br>Al) | 3-methyl-2-buten-1-ol            | 0.2–20 mM                               | 1 N H <sub>2</sub> SO <sub>4</sub>   | 68–97           | PDP                                                        | <sup>126</sup> |
| E-110<br>(90.21%<br>Al) | 3-methyl-3-buten-1-ol            | 0.2–20 mM                               | 1 N H <sub>2</sub> SO <sub>4</sub>   | 20–94           | PDP                                                        | <sup>126</sup> |
| E-110<br>(90.21%<br>Al) | 3-methyl-1-pentyn-3-ol           | 0.2–20 mM                               | 1 N H <sub>2</sub> SO <sub>4</sub>   | 40–90           | PDP                                                        | <sup>126</sup> |
| E-110<br>(90.21%<br>Al) | 5-hexen-1-ol                     | 0.2–20 mM                               | 1 N H <sub>2</sub> SO <sub>4</sub>   | 80–98           | PDP                                                        | <sup>126</sup> |
| Pure                    | 1-buten-3-ol                     | 20 mM                                   | 1 N H <sub>2</sub> SO <sub>4</sub>   | 93              | PDP                                                        | <sup>126</sup> |
| Pure                    | 2-methyl-3-butyn-2-ol            | 20 mM                                   | 1 N H <sub>2</sub> SO <sub>4</sub>   | 87              | PDP                                                        | <sup>126</sup> |
| Pure                    | 3-methyl-2-buten-1-ol            | 20 mM                                   | 1 N H <sub>2</sub> SO <sub>4</sub>   | 68              | PDP                                                        | <sup>126</sup> |
| Pure                    | 3-methyl-3-buten-1-ol            | 20 mM                                   | 1 N H <sub>2</sub> SO <sub>4</sub>   | 50              | PDP                                                        | <sup>126</sup> |
| Pure                    | 3-methyl-1-pentyn-3-ol           | 20 mM                                   | 1 N H <sub>2</sub> SO <sub>4</sub>   | 75              | PDP                                                        | <sup>126</sup> |
| Pure                    | 5-hexen-1-ol                     | 20 mM                                   | 1 N H <sub>2</sub> SO <sub>4</sub>   | 49              | PDP                                                        | <sup>126</sup> |
| 99.98%                  | Sodium dodecyl benzene sulfonate | $1 \cdot 10^{-7}$ – $1 \cdot 10^{-2}$ M | 1 M H <sub>2</sub> SO <sub>4</sub>   | 12.45–<br>86.96 | PDP and EIS<br>at 30 °C                                    | <sup>152</sup> |
| 99.98%                  | Sodium dodecyl benzene sulfonate | $1 \cdot 10^{-4}$ M                     | 1 M H <sub>2</sub> SO <sub>4</sub>   | 55.36–<br>69.14 | PDP at 10–60<br>°C                                         | <sup>152</sup> |
| Al + 2.5%<br>Cu         | Sodium dodecyl benzene sulfonate | $1 \cdot 10^{-7}$ – $1 \cdot 10^{-2}$ M | 1 M H <sub>2</sub> SO <sub>4</sub>   | 15.55–<br>89.46 | PDP and EIS<br>at 30 °C                                    | <sup>152</sup> |
| Al + 2.5%<br>Cu         | Sodium dodecyl benzene sulfonate | $1 \cdot 10^{-4}$ M                     | 1 M H <sub>2</sub> SO <sub>4</sub>   | 58.96–<br>70.54 | PDP at 10–60<br>°C                                         | <sup>152</sup> |
| Al + 7.0%<br>Cu         | Sodium dodecyl benzene sulfonate | $1 \cdot 10^{-7}$ – $1 \cdot 10^{-2}$ M | 1 M H <sub>2</sub> SO <sub>4</sub>   | 17.21–<br>91.38 | PDP and EIS<br>at 30 °C                                    | <sup>152</sup> |
| Al + 7.0%<br>Cu         | Sodium dodecyl benzene sulfonate | $1 \cdot 10^{-4}$ M                     | 1 M H <sub>2</sub> SO <sub>4</sub>   | 61.74–<br>72.45 | PDP at 10–60<br>°C                                         | <sup>152</sup> |
| AA6061                  | Sodium benzoate                  | 1 part in 10<br>parts test<br>solution  | 0.1 M H <sub>2</sub> SO <sub>4</sub> | 29.2–<br>80.3   | WL, PDP, $R_p$<br>and EIS at 5–<br>30 days of<br>immersion | <sup>153</sup> |
| AA6063                  | Sodium benzoate                  | 1 part in 10<br>parts test<br>solution  | 0.1 M H <sub>2</sub> SO <sub>4</sub> | 31.9–<br>63.7   | WL, PDP, $R_p$<br>and EIS at 5–<br>30 days of<br>immersion | <sup>153</sup> |
| NG                      | Polyethylene glycol              | $10^{-5}$ – $10^{-4}$ M                 | 0.1 M H <sub>2</sub> SO <sub>4</sub> | 14.93–<br>54.69 | Thermometric<br>and WL, HE at<br>30 °C                     | <sup>154</sup> |
| NG                      | Polyvinyl alcohol                | $10^{-5}$ – $10^{-4}$ M                 | 0.1 M H <sub>2</sub> SO <sub>4</sub> | 17.59–<br>51.01 | Thermometric<br>and WL, HE at<br>30 °C                     | <sup>154</sup> |

|                       |                                                                               |                                      |                                      |             |                                         |                |
|-----------------------|-------------------------------------------------------------------------------|--------------------------------------|--------------------------------------|-------------|-----------------------------------------|----------------|
| Cold rolled aluminium | 2-nonyl-1,3-imidazoline                                                       | 500 ppm                              | 0.5 M H <sub>2</sub> SO <sub>4</sub> | 88.47       | PDP at 30 °C                            | <sup>136</sup> |
| Cold rolled aluminium | 2-undecyl-1,3-imidazoline                                                     | 500 ppm                              | 0.5 M H <sub>2</sub> SO <sub>4</sub> | 92.30       | PDP at 30 °C                            | <sup>136</sup> |
| Cold rolled aluminium | 2-pentadecyl-1,3-imidazoline                                                  | 500 ppm                              | 0.5 M H <sub>2</sub> SO <sub>4</sub> | 83.63       | PDP at 30 °C                            | <sup>136</sup> |
| Cold rolled aluminium | 2-heptadecyl-1,3-imidazoline                                                  | 500 ppm                              | 0.5 M H <sub>2</sub> SO <sub>4</sub> | 80.15       | PDP at 30 °C                            | <sup>136</sup> |
| AA2024                | 4-4-dimethyloxazolidine-2-thione                                              | 0.1–2.0 mM                           | 0.5 M HNO <sub>3</sub>               | 63.93–93.4  | PDP and EIS at 30 °C                    | <sup>155</sup> |
| 100%                  | 4-amino-6-methyl-3-thioxo-3,4-dihydro-1,2,4-triazin-5(2H)-one                 | 10–100 ppm                           | 1 N HNO <sub>3</sub>                 | 81.46–97.67 | EIS at 25 °C                            | <sup>156</sup> |
| 100%                  | 4-amino-6-benzyl-3-thioxo-3,4-dihydro-1,2,4-triazin-5(2H)-one                 | 10–100 ppm                           | 1 N HNO <sub>3</sub>                 | 71.70–93.25 | EIS at 25 °C                            | <sup>156</sup> |
| 100%                  | 4-amino-4H-1,2,4-triazole-3,5-dimethanol                                      | 10–200 ppm                           | 1 N HNO <sub>3</sub>                 | 16.21–61.94 | Tafel extrapolation at 25 °C            | <sup>157</sup> |
| 100%                  | (4-(benzylideneamino)-4H-1,2,4-triazole-3,5-diyl)dimethanol                   | 10–200 ppm                           | 1 N HNO <sub>3</sub>                 | 21.26–81.05 | Tafel extrapolation at 25 °C            | <sup>157</sup> |
| 100%                  | (4-(4-(dimethylamino)benzylideneamino))-4H-1,2,4-triazole-3,5-diyl)dimethanol | 10–200 ppm                           | 1 N HNO <sub>3</sub>                 | 21.21–83.17 | Tafel extrapolation at 25 °C            | <sup>157</sup> |
| 99.999%               | 3-pyridinecarboxaldehyde thiosemicarbazone                                    | 10 <sup>-4</sup> –10 <sup>-2</sup> M | 1 M HNO <sub>3</sub>                 | 20.5–71.2   | WL and EIS at 25 °C                     | <sup>158</sup> |
| 99.999%               | Isonicotinaldehyde thiosemicarbazone                                          | 10 <sup>-4</sup> –10 <sup>-2</sup> M | 1 M HNO <sub>3</sub>                 | 31.3–83.2   | WL and EIS at 25 °C                     | <sup>158</sup> |
| 99.999%               | 2-pyridinecarboxaldehyde thiosemicarbazone                                    | 10 <sup>-4</sup> –10 <sup>-2</sup> M | 1 M HNO <sub>3</sub>                 | 42.4–91.2   | WL and EIS at 25 °C                     | <sup>158</sup> |
| High-purity           | Purine                                                                        | 10 <sup>-4</sup> –10 <sup>-2</sup> M | 1 M H <sub>3</sub> PO <sub>4</sub>   | 3.92–53.36  | PDP and EIS, deaerated stirred at 25 °C | <sup>159</sup> |
| High-purity           | Purine + 10 <sup>-4</sup> M KI                                                | 10 <sup>-4</sup> –10 <sup>-2</sup> M | 1 M H <sub>3</sub> PO <sub>4</sub>   | 6.76–94.07  | PDP and EIS, deaerated stirred at 25 °C | <sup>159</sup> |
| 99.52%                | Benzalacetophenone                                                            | 1–11 · 10 <sup>-6</sup> M            | 1 M H <sub>3</sub> PO <sub>4</sub>   | 20.78–45.60 | WL and GSP at 30 °C                     | <sup>160</sup> |
| 99.52%                | Dibenzalacetone                                                               | 1–11 · 10 <sup>-6</sup> M            | 1 M H <sub>3</sub> PO <sub>4</sub>   | 38.07–57.70 | WL and GSP at 30 °C                     | <sup>160</sup> |
| 99.52%                | Dibenzal-1, 4-diacetylbenzene                                                 | 1–11 · 10 <sup>-6</sup> M            | 1 M H <sub>3</sub> PO <sub>4</sub>   | 42.80–64.80 | WL and GSP at 30 °C                     | <sup>160</sup> |
| 99.52%                | Benzalacetophenone + 10 <sup>-2</sup> M KI                                    | 1–11 · 10 <sup>-6</sup> M            | 1 M H <sub>3</sub> PO <sub>4</sub>   | 34.90–52.97 | WL at 30 °C                             | <sup>160</sup> |

|        |                                                                                       |                           |                                    |             |                                             |                |
|--------|---------------------------------------------------------------------------------------|---------------------------|------------------------------------|-------------|---------------------------------------------|----------------|
| 99.52% | Dibenzalacetone + 10 <sup>-2</sup> M KI                                               | 1–11 · 10 <sup>-6</sup> M | 1 M H <sub>3</sub> PO <sub>4</sub> | 47.58–65.65 | WL at 30 °C                                 | <sup>160</sup> |
| 99.52% | Dibenzal-1, 4-diacetylbenzene + 10 <sup>-2</sup> M KI                                 | 1–11 · 10 <sup>-6</sup> M | 1 M H <sub>3</sub> PO <sub>4</sub> | 60.25–80.20 | WL at 30 °C                                 | <sup>160</sup> |
| 99.52% | Benzalacetophenone + 10 <sup>-2</sup> M KBr                                           | 1–11 · 10 <sup>-6</sup> M | 1 M H <sub>3</sub> PO <sub>4</sub> | 30.76–49.19 | WL at 30 °C                                 | <sup>160</sup> |
| 99.52% | Dibenzalacetone + 10 <sup>-2</sup> M KBr                                              | 1–11 · 10 <sup>-6</sup> M | 1 M H <sub>3</sub> PO <sub>4</sub> | 41.94–63.77 | WL at 30 °C                                 | <sup>160</sup> |
| 99.52% | Dibenzal-1, 4-diacetylbenzene + 10 <sup>-2</sup> M KBr                                | 1–11 · 10 <sup>-6</sup> M | 1 M H <sub>3</sub> PO <sub>4</sub> | 52.74–75.51 | WL at 30 °C                                 | <sup>160</sup> |
| 99.52% | Benzalacetophenone + 10 <sup>-2</sup> M KCl                                           | 1–11 · 10 <sup>-6</sup> M | 1 M H <sub>3</sub> PO <sub>4</sub> | 25.51–52.04 | WL at 30 °C                                 | <sup>160</sup> |
| 99.52% | Dibenzalacetone + 10 <sup>-2</sup> M KCl                                              | 1–11 · 10 <sup>-6</sup> M | 1 M H <sub>3</sub> PO <sub>4</sub> | 40.06–65.18 | WL at 30 °C                                 | <sup>160</sup> |
| 99.52% | Dibenzal-1, 4-diacetylbenzene + 10 <sup>-2</sup> M KCl                                | 1–11 · 10 <sup>-6</sup> M | 1 M H <sub>3</sub> PO <sub>4</sub> | 48.54–70.35 | WL at 30 °C                                 | <sup>160</sup> |
| 99.47% | 5(-4-nitrophenylazo)-3-phenylamino-2-thioxo-4-thiazolidinone                          | 5–15 · 10 <sup>-7</sup> M | 3 M H <sub>3</sub> PO <sub>4</sub> | 14.2–41.0   | WL after 210 min immersion at 30 °C         | <sup>161</sup> |
| 99.47% | 5(-4-chlorophenylazo)-3-phenylamino-2-thioxo-4-thiazolidinone                         | 5–15 · 10 <sup>-7</sup> M | 3 M H <sub>3</sub> PO <sub>4</sub> | 17.4–43.6   | WL after 210 min immersion at 30 °          | <sup>161</sup> |
| 99.47% | 5(-4-hydrophenylazo)-3-phenylamino-2-thioxo-4-thiazolidinone                          | 5–15 · 10 <sup>-7</sup> M | 3 M H <sub>3</sub> PO <sub>4</sub> | 23.4–50.7   | WL after 210 min immersion at 30 °          | <sup>161</sup> |
| 99.47% | 5(-4-methylphenylazo)-3-phenylamino-2-thioxo-4-thiazolidinone                         | 5–15 · 10 <sup>-7</sup> M | 3 M H <sub>3</sub> PO <sub>4</sub> | 29.2–53.3   | WL after 210 min immersion at 30 °          | <sup>161</sup> |
| 99.47% | 5(-4-methoxyphenylazo)-3-phenylamino-2-thioxo-4-thiazolidinone                        | 5–15 · 10 <sup>-7</sup> M | 3 M H <sub>3</sub> PO <sub>4</sub> | 33.3–55.4   | WL after 210 min immersion and GSP at 30 °C | <sup>161</sup> |
| 99.47% | 5(-4-nitrophenylazo)-3-phenylamino-2-thioxo-4-thiazolidinone + 10 <sup>-2</sup> M KI  | 5–15 · 10 <sup>-7</sup> M | 3 M H <sub>3</sub> PO <sub>4</sub> | 58.2–69.4   | WL after 210 min immersion at 30 °          | <sup>161</sup> |
| 99.47% | 5(-4-chlorophenylazo)-3-phenylamino-2-thioxo-4-thiazolidinone + 10 <sup>-2</sup> M KI | 5–15 · 10 <sup>-7</sup> M | 3 M H <sub>3</sub> PO <sub>4</sub> | 61.7–71.6   | WL after 210 min immersion at 30 °          | <sup>161</sup> |
| 99.47% | 5(-4-hydrophenylazo)-3-phenylamino-2-thioxo-4-thiazolidinone + 10 <sup>-2</sup> M KI  | 5–15 · 10 <sup>-7</sup> M | 3 M H <sub>3</sub> PO <sub>4</sub> | 65.2–74.7   | WL after 210 min immersion at               | <sup>161</sup> |

|        |                                                                                          |                           |                                    |           |                                    |                |
|--------|------------------------------------------------------------------------------------------|---------------------------|------------------------------------|-----------|------------------------------------|----------------|
|        |                                                                                          |                           |                                    |           | 30 °                               |                |
| 99.47% | 5(-4-methylphenylazo)-3-phenylamino-2-thioxo-4-thiazolidinone + 10 <sup>-2</sup> M KI    | 5–15 · 10 <sup>-7</sup> M | 3 M H <sub>3</sub> PO <sub>4</sub> | 70.1–77.4 | WL after 210 min immersion at 30 ° | <sup>161</sup> |
| 99.47% | 5(-4-methoxyphenylazo)-3-phenylamino-2-thioxo-4-thiazolidinone + 10 <sup>-2</sup> M KI   | 5–15 · 10 <sup>-7</sup> M | 3 M H <sub>3</sub> PO <sub>4</sub> | 75.9–81.1 | WL after 210 min immersion at 30 ° | <sup>161</sup> |
| 99.47% | 5(-4-nitrophenylazo)-3-phenylamino-2-thioxo-4-thiazolidinone + 10 <sup>-2</sup> M KSCN   | 5–15 · 10 <sup>-7</sup> M | 3 M H <sub>3</sub> PO <sub>4</sub> | 48.3–59.0 | WL after 210 min immersion at 30 ° | <sup>161</sup> |
| 99.47% | 5(-4-chlorophenylazo)-3-phenylamino-2-thioxo-4-thiazolidinone + 10 <sup>-2</sup> M KSCN  | 5–15 · 10 <sup>-7</sup> M | 3 M H <sub>3</sub> PO <sub>4</sub> | 50.7–64.2 | WL after 210 min immersion at 30 ° | <sup>161</sup> |
| 99.47% | 5(-4-hydrophenylazo)-3-phenylamino-2-thioxo-4-thiazolidinone + 10 <sup>-2</sup> M KSCN   | 5–15 · 10 <sup>-7</sup> M | 3 M H <sub>3</sub> PO <sub>4</sub> | 54.7–66.3 | WL after 210 min immersion at 30 ° | <sup>161</sup> |
| 99.47% | 5(-4-methylphenylazo)-3-phenylamino-2-thioxo-4-thiazolidinone + 10 <sup>-2</sup> M KSCN  | 5–15 · 10 <sup>-7</sup> M | 3 M H <sub>3</sub> PO <sub>4</sub> | 59.0–69.4 | WL after 210 min immersion at 30 ° | <sup>161</sup> |
| 99.47% | 5(-4-methoxyphenylazo)-3-phenylamino-2-thioxo-4-thiazolidinone + 10 <sup>-2</sup> M KSCN | 5–15 · 10 <sup>-7</sup> M | 3 M H <sub>3</sub> PO <sub>4</sub> | 63.2–73.4 | WL after 210 min immersion at 30 ° | <sup>161</sup> |
| 99.47% | 5(-4-nitrophenylazo)-3-phenylamino-2-thioxo-4-thiazolidinone + 10 <sup>-2</sup> M KBr    | 5–15 · 10 <sup>-7</sup> M | 3 M H <sub>3</sub> PO <sub>4</sub> | 42.2–54.9 | WL after 210 min immersion at 30 ° | <sup>161</sup> |
| 99.47% | 5(-4-chlorophenylazo)-3-phenylamino-2-thioxo-4-thiazolidinone + 10 <sup>-2</sup> M KBr   | 5–15 · 10 <sup>-7</sup> M | 3 M H <sub>3</sub> PO <sub>4</sub> | 44.8–57.1 | WL after 210 min immersion at 30 ° | <sup>161</sup> |
| 99.47% | 5(-4-hydrophenylazo)-3-phenylamino-2-thioxo-4-thiazolidinone + 10 <sup>-2</sup> M KBr    | 5–15 · 10 <sup>-7</sup> M | 3 M H <sub>3</sub> PO <sub>4</sub> | 46.9–58.9 | WL after 210 min immersion at 30 ° | <sup>161</sup> |
| 99.47% | 5(-4-methylphenylazo)-3-phenylamino-2-thioxo-4-thiazolidinone + 10 <sup>-2</sup> M KBr   | 5–15 · 10 <sup>-7</sup> M | 3 M H <sub>3</sub> PO <sub>4</sub> | 51.0–63.5 | WL after 210 min immersion at 30 ° | <sup>161</sup> |
| 99.47% | 5(-4-methoxyphenylazo)-3-phenylamino-2-thioxo-4-thiazolidinone + 10 <sup>-2</sup> M KBr  | 5–15 · 10 <sup>-7</sup> M | 3 M H <sub>3</sub> PO <sub>4</sub> | 54.4–69.0 | WL after 210 min immersion at 30 ° | <sup>161</sup> |
| 99.99% | Sodium oleate                                                                            | 1–200 · 10 <sup>-5</sup>  | 1 M H <sub>3</sub> PO <sub>4</sub> | 6.00–     | Polarization in deaerated          | <sup>163</sup> |

|            |                                                                       |                         |                                    |            |                                                      |                |
|------------|-----------------------------------------------------------------------|-------------------------|------------------------------------|------------|------------------------------------------------------|----------------|
|            |                                                                       | M                       |                                    | 88.80      | stirred solutions at 25 °C                           |                |
| Al-4.5% Cu | Sodium oleate                                                         | $1-200 \cdot 10^{-5}$ M | 1 M H <sub>3</sub> PO <sub>4</sub> | 6.67–95.60 | Polarization in deaerated stirred solutions at 25 °C | <sup>163</sup> |
| Al-7.5% Cu | Sodium oleate                                                         | $1-200 \cdot 10^{-5}$ M | 1 M H <sub>3</sub> PO <sub>4</sub> | 6.74–99.28 | Polarization in deaerated stirred solutions at 25 °C | <sup>163</sup> |
| 98.5%      | <i>N</i> -(4- <i>N,N</i> -dimethylamino) benzylidene-4-methoxyaniline | 0.2–0.8 wt.%            | 0.1 N trichloroacetic acid         | 45.5–62.6  | WL after 24 h immersion and at 25 °C                 | <sup>164</sup> |
| 98.5%      | <i>N</i> -(4- <i>N,N</i> -dimethylamino) benzylidene-2-methylaniline  | 0.2–0.8 wt.%            | 0.1 N trichloroacetic acid         | 41.7–56.3  | WL after 24 h immersion and at 25 °C                 | <sup>164</sup> |
| 98.5%      | <i>N</i> -(4- <i>N,N</i> -dimethylamino) benzylidene-3-methylaniline  | 0.2–0.8 wt.%            | 0.1 N trichloroacetic acid         | 36.7–53.1  | WL after 24 h immersion and at 25 °C                 | <sup>164</sup> |
| 98.5%      | <i>N</i> -(4- <i>N,N</i> -dimethylamino) benzylidene-4-methoxyaniline | 0.2–0.8 wt.%            | 0.5 N trichloroacetic acid         | 51.7–65.3  | WL and thermometric after 70 min immersion at 25 °C  | <sup>164</sup> |
| 98.5%      | <i>N</i> -(4- <i>N,N</i> -dimethylamino) benzylidene-2-methylaniline  | 0.2–0.8 wt.%            | 0.5 N trichloroacetic acid         | 45.2–58.9  | WL and thermometric after 70 min immersion at 25 °C  | <sup>164</sup> |
| 98.5%      | <i>N</i> -(4- <i>N,N</i> -dimethylamino) benzylidene-3-methylaniline  | 0.2–0.8 wt.%            | 0.5 N trichloroacetic acid         | 41.6–55.9  | WL and thermometric after 70 min immersion at 25 °C  | <sup>164</sup> |
| 98.5%      | <i>N</i> -(4- <i>N,N</i> -dimethylamino) benzylidene-4-methoxyaniline | 0.2–0.8 wt.%            | 1.0 N trichloroacetic acid         | 57.4–77.4  | WL and thermometric after 23 min immersion at 25 °C  | <sup>164</sup> |
| 98.5%      | <i>N</i> -(4- <i>N,N</i> -dimethylamino) benzylidene-2-methylaniline  | 0.2–0.8 wt.%            | 1.0 N trichloroacetic acid         | 52.3–66.8  | WL and thermometric after 23 min immersion at 25 °C  | <sup>164</sup> |
| 98.5%      | <i>N</i> -(4- <i>N,N</i> -dimethylamino) benzylidene-3-methylaniline  | 0.2–0.8 wt.%            | 1.0 N trichloroacetic acid         | 48.1–65.8  | WL and thermometric after 23 min immersion at        | <sup>164</sup> |

|        |                                                                              |                                      |                                              |             | 25 °C                                               |                |
|--------|------------------------------------------------------------------------------|--------------------------------------|----------------------------------------------|-------------|-----------------------------------------------------|----------------|
| 98.5%  | <i>N</i> -(4- <i>N,N</i> -dimethylamino) benzylidene-4-methoxyaniline        | 0.2–0.8 wt.%                         | 2.0 N trichloroacetic acid                   | 94.1–98.5   | WL and thermometric after 14 min immersion at 25 °C | <sup>164</sup> |
| 98.5%  | <i>N</i> -(4- <i>N,N</i> -dimethylamino) benzylidene-2-methylaniline         | 0.2–0.8 wt.%                         | 2.0 N trichloroacetic acid                   | 89.2–94.6   | WL and thermometric after 14 min immersion at 25 °C | <sup>164</sup> |
| 98.5%  | <i>N</i> -(4- <i>N,N</i> -dimethylamino) benzylidene-3-methylaniline         | 0.2–0.8 wt.%                         | 2.0 N trichloroacetic acid                   | 88.3–93.5   | WL and thermometric after 14 min immersion at 25 °C | <sup>164</sup> |
| 98.02% | Sulphathiazole                                                               | 5 mM                                 | 0.01 M trichloroacetic acid                  | 74.39       | WL                                                  | <sup>166</sup> |
| 98.02% | Sulphathiazole                                                               | 20 mM                                | 0.01–0.10 M trichloroacetic acid             | 75.80–88.79 | WL after 2 h immersion at 40–60 °C                  | <sup>166</sup> |
| 98.02% | Sulphathiazole                                                               | 20 mM                                | 0.05 M trichloroacetic acid                  | 78.72–59.22 | WL after 1 day immersion and GSP                    | <sup>166</sup> |
| 95%    | Diethylene triamine pentamethylene phosphonic acid                           | 50–250 ppm                           | Aqueous solution at pH = 3                   | 59.0–69.0   | WL after 1 day immersion                            | <sup>169</sup> |
| 95%    | Diethylene triamine pentamethylene phosphonic acid + 5 ppm Zn <sup>2+</sup>  | 50–250 ppm                           | Aqueous solution at pH = 3                   | 82.0–96.0   | WL after 1 day immersion                            | <sup>169</sup> |
| 95%    | Diethylene triamine pentamethylene phosphonic acid + 10 ppm Zn <sup>2+</sup> | 50–250 ppm                           | Aqueous solution at pH = 3                   | 83.0–98.0   | WL after 1 day immersion                            | <sup>169</sup> |
| 95%    | Diethylene triamine pentamethylene phosphonic acid + 25 ppm Zn <sup>2+</sup> | 50–250 ppm                           | Aqueous solution at pH = 3                   | 91.0–98.0   | WL after 1 day immersion                            | <sup>169</sup> |
| 95%    | Diethylene triamine pentamethylene phosphonic acid + 50 ppm Zn <sup>2+</sup> | 50–250 ppm                           | Aqueous solution at pH = 3                   | 95.0–98.0   | WL after 1 day immersion                            | <sup>169</sup> |
| 99.99% | Alanine                                                                      | 10 <sup>-4</sup> –10 <sup>-1</sup> M | 1 M HCl + 1 M H <sub>2</sub> SO <sub>4</sub> | 4.8–64.2    | WL and R <sub>p</sub> at 25 °C                      | <sup>170</sup> |
| 99.99% | Leucine                                                                      | 10 <sup>-4</sup> –10 <sup>-1</sup> M | 1 M HCl + 1 M H <sub>2</sub> SO <sub>4</sub> | 6.9–68.3    | WL and R <sub>p</sub> at 25 °C                      | <sup>170</sup> |
| 99.99% | Methionine                                                                   | 10 <sup>-4</sup> –10 <sup>-1</sup> M | 1 M HCl + 1 M H <sub>2</sub> SO <sub>4</sub> | 51.3–91.2   | WL and R <sub>p</sub> at 25 °C                      | <sup>170</sup> |
| 99.99% | Valine                                                                       | 10 <sup>-4</sup> –10 <sup>-1</sup> M | 1 M HCl + 1 M                                | 5.3–        | WL and R <sub>p</sub> at                            | <sup>170</sup> |

|        |                 |                                      |                                              |           |                                                           |                |
|--------|-----------------|--------------------------------------|----------------------------------------------|-----------|-----------------------------------------------------------|----------------|
|        |                 |                                      | H <sub>2</sub> SO <sub>4</sub>               | 67.5      | 25 °C                                                     |                |
| 99.99% | Proline         | 10 <sup>-4</sup> –10 <sup>-1</sup> M | 1 M HCl + 1 M H <sub>2</sub> SO <sub>4</sub> | 4.8–87.7  | WL and R <sub>p</sub> at 25 °C                            | <sup>170</sup> |
| 99.99% | Tryptophan      | 10 <sup>-4</sup> –10 <sup>-1</sup> M | 1 M HCl + 1 M H <sub>2</sub> SO <sub>4</sub> | 29.6–93.0 | WL and R <sub>p</sub> at 25 °C                            | <sup>170</sup> |
| AA6061 | Sodium benzoate | 1 part in 10 parts test solution     | 0.5 M CH <sub>3</sub> COOH                   | 20.8–89.6 | WL, PDP, R <sub>p</sub> and EIS at 5–30 days of immersion | <sup>153</sup> |
| AA6063 | Sodium benzoate | 1 part in 10 parts test solution     | 0.5 M CH <sub>3</sub> COOH                   | 64.5–89.5 | WL, PDP, R <sub>p</sub> and EIS at 5–30 days of immersion | <sup>153</sup> |

\*  $\eta$  was calculated based on the values of the corrosion rate, corrosion current, or corrosion current density or the resistance of the blank solution and inhibited samples.

\*\*  $\eta$  was calculated based on the sum ( $R_{\text{oxide}} + R_p + R_{\text{inhibitor}}$ ) of the blank solution and of the inhibited samples.

NG – not given
